# Supplementary material for: Identification of Pluripotent and Adult Stem Cell Genes Unrelated to Cell Cycle and Associated with Poor Prognosis in Multiple Myeloma
Source: PubMed Central journal article supplement (PMC3409163; doi:10.1371/journal.pone.0042161), 2012-07-31
Supplement: pone.0042161.s003.pdf [file pone.0042161.s003.pdf]

Supplementary Table S1. Clinical patient data.

| Characteristic                                | HM (n=206)    |
|-----------------------------------------------|---------------|
| Age (median[range])                           | 57[27-73]     |
| Monoclonal protein                            |               |
| IgG                                           | 120           |
| IgA                                           | 46            |
| Bence Jones                                   | 35            |
| Asecretory                                    | 4             |
| IgD                                           | 1             |
| NA                                            | 0             |
| Myeloma in Durie and Salmon (SD) stage        |               |
| I                                             | 22            |
| II                                            | 31            |
| III                                           | 153           |
| Myeloma in ISS stage                          |               |
| I                                             | 97            |
| II                                            | 73            |
| III                                           | 33            |
| NA                                            | 3             |
| Serum $\beta$ 2-microglobulin (median[range]) | 2.9[1.3-53.6] |

Table S1. Clinical characteristics of patients of HM cohort. Data are median values and ranges for age, serum monoclonal protein, serum- $\beta$ 2-microglobulin and the Salmon-Durie and International Staging System (ISS) stages. NA, not available.
