# Supplementary material for: Identification of Pluripotent and Adult Stem Cell Genes Unrelated to Cell Cycle and Associated with Poor Prognosis in Multiple Myeloma
Source: PubMed Central journal article supplement (PMC3409163; doi:10.1371/journal.pone.0042161), 2012-07-31
Supplement: pone.0042161.s004.pdf [file pone.0042161.s004.pdf]

**Table S2. The 885 unique probe sets overexpressed in MMCs or in HMCLs compared to normal counterparts.**

| Probe sets   | Name             | Cytoband        | Description                                                                                                                                                                                                                                                                                                                                  |
|--------------|------------------|-----------------|----------------------------------------------------------------------------------------------------------------------------------------------------------------------------------------------------------------------------------------------------------------------------------------------------------------------------------------------|
| 1555225_at   | C1orf43          | 1q21.3          | chromosome 1 open reading frame 43                                                                                                                                                                                                                                                                                                           |
| 1555226_s_at | C1orf43          | 1q21.3          | chromosome 1 open reading frame 43                                                                                                                                                                                                                                                                                                           |
| 200837_at    | BCAP31           | Xq28            | B-cell receptor-associated protein 31                                                                                                                                                                                                                                                                                                        |
| 201076_at    | NHP2L1           | 22q13.2         | NHP2 non-histone chromosome protein 2-like 1 ( <i>S. cerevisiae</i> )                                                                                                                                                                                                                                                                        |
| 201119_s_at  | COX8A            | 11q13.1         | cytochrome c oxidase subunit 8A (ubiquitous)                                                                                                                                                                                                                                                                                                 |
| 201123_s_at  | EIF5A            | 17p13.1         | eukaryotic translation initiation factor 5A                                                                                                                                                                                                                                                                                                  |
| 201802_at    | SLC29A1          | 6p21.1          | solute carrier family 29 (nucleoside transporters), member 1                                                                                                                                                                                                                                                                                 |
| 201927_s_at  | PKP4             | 2q24.1          | plakophilin 4                                                                                                                                                                                                                                                                                                                                |
| 202159_at    | FARSA            | 19p13.2         | phenylalanyl-tRNA synthetase, alpha subunit                                                                                                                                                                                                                                                                                                  |
| 202322_s_at  | GGPS1            | 1q42.3          | geranylgeranyl diphosphate synthase 1                                                                                                                                                                                                                                                                                                        |
| 202480_s_at  | DEDD             | 1q23.3          | death effector domain containing                                                                                                                                                                                                                                                                                                             |
| 202846_s_at  | PIGC             | 1q24.3          | phosphatidylinositol glycan anchor biosynthesis, class C                                                                                                                                                                                                                                                                                     |
| 203109_at    | UBE2M            | 19q13.43        | ubiquitin-conjugating enzyme E2M (UBC12 homolog, yeast)                                                                                                                                                                                                                                                                                      |
| 203208_s_at  | MTFR1            | 8q13.1          | mitochondrial fission regulator 1                                                                                                                                                                                                                                                                                                            |
| 203235_at    | THOP1            | 19p13.3         | thimet oligopeptidase 1                                                                                                                                                                                                                                                                                                                      |
| 203515_s_at  | PMVK             | 1q21.3          | phosphomevalonate kinase                                                                                                                                                                                                                                                                                                                     |
| 203679_at    | TMED1            | 19p13.2         | transmembrane emp24 protein transport domain containing 1                                                                                                                                                                                                                                                                                    |
| 204266_s_at  | CHKA             | 11q13.2         | choline kinase alpha                                                                                                                                                                                                                                                                                                                         |
| 204587_at    | SLC25A14         | Xq26.1          | solute carrier family 25 (mitochondrial carrier, brain), member 14                                                                                                                                                                                                                                                                           |
| 208784_s_at  | KLHDC3           | 6p21.1          | kelch domain containing 3                                                                                                                                                                                                                                                                                                                    |
| 208799_at    | PSMB5            | 14q11.2         | proteasome (prosome, macropain) subunit, beta type, 5                                                                                                                                                                                                                                                                                        |
| 209219_at    | RDBP             | HSCHR6_MHC_SSTO | RD RNA binding protein                                                                                                                                                                                                                                                                                                                       |
| 209759_s_at  | DCI              | 16p13.3         | dodecenoyl-Coenzyme A delta isomerase (3,2 trans-enoyl-Coenzyme A isomerase)                                                                                                                                                                                                                                                                 |
| 210976_s_at  | PFKM             | 12q13.11        | phosphofructokinase, muscle                                                                                                                                                                                                                                                                                                                  |
| 211855_s_at  | SLC25A14         | Xq26.1          | solute carrier family 25 (mitochondrial carrier, brain), member 14                                                                                                                                                                                                                                                                           |
| 212541_at    | FLAD1            | 1q21.3          | FAD1 flavin adenine dinucleotide synthetase homolog ( <i>S. cerevisiae</i> )                                                                                                                                                                                                                                                                 |
| 213222_at    | PLCB1            | 20p12.3         | phospholipase C, beta 1 (phosphoinositide-specific)                                                                                                                                                                                                                                                                                          |
| 214383_x_at  | KLHDC3           | 6p21.1          | kelch domain containing 3                                                                                                                                                                                                                                                                                                                    |
| 215667_x_at  | LOC1001328<br>32 | ---             | postmeiotic segregation increased 2-like 5-like /// PMS2 postmeiotic segregation increased 2 ( <i>S. cerevisiae</i> )-like /// postmeiotic segregation increased 2-like 1 pseudogene /// postmeiotic segregation increased 2-like 2 pseudogene /// postmeiotic segregation increased 2-like 3 /// postmeiotic segregation increased 2-like 5 |
| 216194_s_at  | TBCB             | 19q13.12        | tubulin folding cofactor B                                                                                                                                                                                                                                                                                                                   |
| 216602_s_at  | FARSA            | 19p13.2         | phenylalanyl-tRNA synthetase, alpha subunit                                                                                                                                                                                                                                                                                                  |
| 216843_x_at  | PMS2L1           | 7q22.1          | postmeiotic segregation increased 2-like 1 pseudogene                                                                                                                                                                                                                                                                                        |
| 218046_s_at  | MRPS16           | 10q22.2         | mitochondrial ribosomal protein S16                                                                                                                                                                                                                                                                                                          |
| 218188_s_at  | TIMM13           | 19p13.3         | translocase of inner mitochondrial membrane 13 homolog (yeast)                                                                                                                                                                                                                                                                               |
| 218227_at    | NUBP2            | 16p13.3         | nucleotide binding protein 2 (MinD homolog, <i>E. coli</i> )                                                                                                                                                                                                                                                                                 |
| 218481_at    | EXOSC5           | 19q13.2         | exosome component 5                                                                                                                                                                                                                                                                                                                          |
| 218529_at    | CD320            | 19p13.2         | CD320 molecule                                                                                                                                                                                                                                                                                                                               |
| 218695_at    | EXOSC4           | 8q24.3          | exosome component 4                                                                                                                                                                                                                                                                                                                          |
| 219061_s_at  | LAGE3            | Xq28            | L antigen family, member 3                                                                                                                                                                                                                                                                                                                   |
| 219372_at    | IFT81            | 12q24.11        | intraflagellar transport 81 homolog ( <i>Chlamydomonas</i> )                                                                                                                                                                                                                                                                                 |
| 221270_s_at  | QTRT1            | 19p13.2         | queuine tRNA-ribosyltransferase 1                                                                                                                                                                                                                                                                                                            |
| 221579_s_at  | NUDT3            | 6p21.31         | nudix (nucleoside diphosphate linked moiety X)-type motif 3                                                                                                                                                                                                                                                                                  |
| 221604_s_at  | PEX16            | 11p11.2         | peroxisomal biogenesis factor 16                                                                                                                                                                                                                                                                                                             |
| 221622_s_at  | TMEM126B         | 11q14.1         | transmembrane protein 126B                                                                                                                                                                                                                                                                                                                   |
| 221759_at    | G6PC3            | 17q21.31        | glucose 6 phosphatase, catalytic, 3                                                                                                                                                                                                                                                                                                          |
| 221797_at    | C17orf90         | 17q25.3         | chromosome 17 open reading frame 90                                                                                                                                                                                                                                                                                                          |
| 221939_at    | YIPF2            | 19p13.2         | Yip1 domain family, member 2                                                                                                                                                                                                                                                                                                                 |
| 222155_s_at  | GPR172A          | 8q24.3          | G protein-coupled receptor 172A                                                                                                                                                                                                                                                                                                              |
| 222736_s_at  | TMEM38B          | 9q31.2          | transmembrane protein 38B                                                                                                                                                                                                                                                                                                                    |
| 222988_s_at  | TMEM9            | 1q32.1          | transmembrane protein 9                                                                                                                                                                                                                                                                                                                      |
| 223989_s_at  | REXO2            | 11q23.2         | REX2, RNA exonuclease 2 homolog ( <i>S. cerevisiae</i> )                                                                                                                                                                                                                                                                                     |
| 225385_s_at  | HNRPLL           | 2p22.1          | heterogeneous nuclear ribonucleoprotein L-like                                                                                                                                                                                                                                                                                               |
| 225421_at    | PM20D2           | 6q15            | peptidase M20 domain containing 2                                                                                                                                                                                                                                                                                                            |
| 225625_at    | ALKBH2           | 12q24.11        | alkB, alkylation repair homolog 2 ( <i>E. coli</i> )                                                                                                                                                                                                                                                                                         |
| 225638_at    | C1orf31          | 1q42.2          | chromosome 1 open reading frame 31                                                                                                                                                                                                                                                                                                           |
| 225647_s_at  | CTSC             | 11q14.2         | cathepsin C                                                                                                                                                                                                                                                                                                                                  |
| 225722_at    | ---              | ---             | ---                                                                                                                                                                                                                                                                                                                                          |
| 227369_at    | SERBP1           | 1p31.3          | SERPINE1 mRNA binding protein 1                                                                                                                                                                                                                                                                                                              |
| 227633_at    | RHEB             | 7q36.1          | Ras homolog enriched in brain                                                                                                                                                                                                                                                                                                                |
| 227936_at    | TMEM68           | 8q12.1          | transmembrane protein 68                                                                                                                                                                                                                                                                                                                     |
| 228654_at    | SPIN4            | Xq11.1          | spindlin family, member 4                                                                                                                                                                                                                                                                                                                    |
| 229666_s_at  | CSTF3            | 11p13           | cleavage stimulation factor, 3' pre-RNA, subunit 3, 77kDa                                                                                                                                                                                                                                                                                    |
| 232007_at    | AGPAT5           | 8p23.1          | 1-acylglycerol-3-phosphate O-acyltransferase 5 (lysophosphatidic acid acyltransferase, epsilon)                                                                                                                                                                                                                                              |
| 236026_at    | GPATCH2          | 1q41            | G patch domain containing 2                                                                                                                                                                                                                                                                                                                  |
| 238418_at    | SLC35B4          | 7q33            | solute carrier family 35, member B4                                                                                                                                                                                                                                                                                                          |
| 238662_at    | ATPBD4           | 15q14           | ATP binding domain 4                                                                                                                                                                                                                                                                                                                         |
| 50374_at     | C17orf90         | 17q25.3         | chromosome 17 open reading frame 90                                                                                                                                                                                                                                                                                                          |
| 1555764_s_at | TIMM10           | 11q12.1         | translocase of inner mitochondrial membrane 10 homolog (yeast)                                                                                                                                                                                                                                                                               |

|              |           |          |                                                                                   |
|--------------|-----------|----------|-----------------------------------------------------------------------------------|
| 1556096_s_at | UNC13C    | 15q21.3  | unc-13 homolog C (C. elegans)                                                     |
| 1560916_a_at | DPY19L1   | 7p14.2   | dpy-19-like 1 (C. elegans)                                                        |
| 202927_at    | PIN1      | 19p13.2  | peptidylprolyl cis/trans isomerase, NIMA-interacting 1                            |
| 203022_at    | RNASEH2A  | 19p13.2  | ribonuclease H2, subunit A                                                        |
| 203919_at    | TCEA2     | 20q13.33 | transcription elongation factor A (SII), 2                                        |
| 205194_at    | PSPH      | 7p11.2   | phosphoserine phosphatase                                                         |
| 207628_s_at  | WBSCR22   | 7q11.23  | Williams Beuren syndrome chromosome region 22                                     |
| 208972_s_at  | ATP5G1    | 17q21.32 | ATP synthase, H+ transporting, mitochondrial F0 complex, subunit C1 (subunit 9)   |
| 209837_at    | AP4M1     | 7q22.1   | adaptor-related protein complex 4, mu 1 subunit                                   |
| 212215_at    | PREPL     | 2p21     | prolyl endopeptidase-like                                                         |
| 214473_x_at  | PMS2L3    | 7q11.23  | postmeiotic segregation increased 2-like 3                                        |
| 214526_x_at  | PMS2L1    | 7q22.1   | postmeiotic segregation increased 2-like 1 pseudogene                             |
| 214756_x_at  | PMS2L1    | 7q22.1   | postmeiotic segregation increased 2-like 1 pseudogene                             |
| 216525_x_at  | PMS2L3    | 7q11.23  | postmeiotic segregation increased 2-like 3                                        |
| 217960_s_at  | TOMM22    | 22q13.1  | translocase of outer mitochondrial membrane 22 homolog (yeast)                    |
| 223156_at    | MRPS23    | 17q22    | mitochondrial ribosomal protein S23                                               |
| 223272_s_at  | C1orf57   | 1q42.2   | chromosome 1 open reading frame 57                                                |
| 223917_s_at  | SLC39A3   | 19p13.3  | solute carrier family 39 (zinc transporter), member 3                             |
| 227415_at    | LOC283508 | ---      | hypothetical protein LOC283508                                                    |
| 227500_at    | FBXL18    | 7p22.1   | F-box and leucine-rich repeat protein 18                                          |
| 238914_at    | DCC       | 18q21.2  | deleted in colorectal carcinoma                                                   |
| 242082_at    | MMAB      | 12q24.11 | methylmalonic aciduria (cobalamin deficiency) cblB type                           |
| 203550_s_at  | FAM189B   | 1q22     | family with sequence similarity 189, member B                                     |
| 205190_at    | PLS1      | 3q23     | plastin 1 (I isoform)                                                             |
| 210707_x_at  | PMS2L11   | 7q11.23  | postmeiotic segregation increased 2-like 11 pseudogene                            |
| 217294_s_at  | ENO1      | 1p36.23  | enolase 1, (alpha)                                                                |
| 220864_s_at  | NDUFA13   | 19p13.11 | NADH dehydrogenase (ubiquinone) 1 alpha subcomplex, 13                            |
| 226328_at    | KLF16     | 19p13.3  | Kruppel-like factor 16                                                            |
| 227669_at    | BRP44     | 1q24.2   | Brain protein 44                                                                  |
| 230032_at    | OSGEP1    | 2q32.2   | O-sialoglycoprotein endopeptidase-like 1                                          |
| 1567080_s_at | CLN6      | 15q23    | ceroid-lipofuscinosis, neuronal 6, late infantile, variant                        |
| 1569969_a_at | UNC13C    | 15q21.3  | unc-13 homolog C (C. elegans)                                                     |
| 201405_s_at  | COPS6     | 7q22.1   | COP9 constitutive photomorphogenic homolog subunit 6 (Arabidopsis)                |
| 201577_at    | NME1      | 17q21.33 | non-metastatic cells 1, protein (NM23A) expressed in                              |
| 201706_s_at  | PEX19     | 1q23.2   | peroxisomal biogenesis factor 19                                                  |
| 203775_at    | SLC25A13  | 7q21.3   | solute carrier family 25, member 13 (citrin)                                      |
| 204521_at    | C12orf24  | 12q24.11 | chromosome 12 open reading frame 24                                               |
| 205224_at    | SURF2     | 9q34.2   | surfeit 2                                                                         |
| 209445_x_at  | C7orf44   | 7p13     | chromosome 7 open reading frame 44                                                |
| 212155_at    | RNF187    | 1q42.13  | ring finger protein 187                                                           |
| 218011_at    | UBL5      | 19p13.2  | ubiquitin-like 5                                                                  |
| 220587_s_at  | MLST8     | 16p13.3  | MTOR associated protein, LST8 homolog (S. cerevisiae)                             |
| 222347_at    | LOC644450 | ---      | hypothetical protein LOC644450                                                    |
| 225201_s_at  | MRPL14    | 6p21.1   | mitochondrial ribosomal protein L14                                               |
| 227008_at    | HDDC3     | 15q26.1  | HD domain containing 3                                                            |
| 230194_at    | LRPPRC    | 2p21     | leucine-rich PPR-motif containing                                                 |
| 1554577_a_at | PSMD10    | Xq22.3   | proteasome (prosome, macropain) 26S subunit, non-ATPase, 10                       |
| 1556095_at   | UNC13C    | 15q21.3  | unc-13 homolog C (C. elegans)                                                     |
| 200885_at    | RHOC      | 1p13.2   | ras homolog gene family, member C                                                 |
| 202382_s_at  | GMPDA1    | 5q31.3   | glucosamine-6-phosphate deaminase 1                                               |
| 202830_s_at  | SLC37A4   | 11q23.3  | solute carrier family 37 (glucose-6-phosphate transporter), member 4              |
| 204766_s_at  | NUDT1     | 7p22.3   | nudix (nucleoside diphosphate linked moiety X)-type motif 1                       |
| 209068_at    | HNRPDL    | 4q21.22  | heterogeneous nuclear ribonucleoprotein D-like                                    |
| 211043_s_at  | CLTB      | 5q35.2   | clathrin, light chain (Lcb)                                                       |
| 211752_s_at  | NDUFS7    | 19p13.3  | NADH dehydrogenase (ubiquinone) Fe-S protein 7, 20kDa (NADH-coenzyme Q reductase) |
| 212792_at    | DPY19L1   | 7p14.2   | dpy-19-like 1 (C. elegans)                                                        |
| 213504_at    | COPS6     | 7q22.1   | COP9 constitutive photomorphogenic homolog subunit 6 (Arabidopsis)                |
| 213893_x_at  | PMS2L5    | 7q11.23  | postmeiotic segregation increased 2-like 5                                        |
| 218507_at    | C7orf68   | 7q32.1   | chromosome 7 open reading frame 68                                                |
| 218654_s_at  | MRPS33    | 7q34     | mitochondrial ribosomal protein S33                                               |
| 218671_s_at  | ATPIF1    | 1p35.3   | ATPase inhibitory factor 1                                                        |
| 218689_at    | FANCF     | 11p14.3  | Fanconi anemia, complementation group F                                           |
| 218908_at    | ASPSR1    | 17q25.3  | alveolar soft part sarcoma chromosome region, candidate 1                         |
| 223306_at    | EBPL      | 13q14.2  | emopamil binding protein-like                                                     |
| 223461_at    | TBC1D7    | 6p24.1   | TBC1 domain family, member 7                                                      |
| 223649_s_at  | SLC25A39  | 17q21.31 | solute carrier family 25, member 39                                               |
| 226414_s_at  | ANAPC11   | 17q25.3  | anaphase promoting complex subunit 11                                             |
| 228879_at    | SNORD104  | 17q23.3  | small nucleolar RNA, C/D box 104                                                  |
| 229371_at    | ---       | ---      | ---                                                                               |
| 233350_s_at  | TEX264    | 3p21.2   | testis expressed 264                                                              |
| 238529_at    | LOC730631 | ---      | Hypothetical LOC730631                                                            |
| 243661_at    | ZNF273    | 7q11.21  | zinc finger protein 273                                                           |
| 58696_at     | EXOSC4    | 8q24.3   | exosome component 4                                                               |
| 1554417_s_at | APH1A     | 1q21.2   | anterior pharynx defective 1 homolog A (C. elegans)                               |
| 203219_s_at  | APRT      | 16q24.3  | adenine phosphoribosyltransferase                                                 |

|              |            |          |                                                                                                              |
|--------------|------------|----------|--------------------------------------------------------------------------------------------------------------|
| 204004_at    | PAWR       | 12q21.2  | PRKC, apoptosis, WT1, regulator                                                                              |
| 206441_s_at  | COMMD4     | 15q24.2  | COMM domain containing 4                                                                                     |
| 213357_at    | GTF2H5     | 6q25.3   | general transcription factor IIH, polypeptide 5                                                              |
| 218159_at    | DDRKG1     | 20p13    | DDRKG domain containing 1                                                                                    |
| 225646_at    | CTSC       | 11q14.2  | cathepsin C                                                                                                  |
| 225961_at    | KLHDC5     | 12p11.22 | kelch domain containing 5                                                                                    |
| 226963_at    | BTF3L4     | 1p32.3   | basic transcription factor 3-like 4                                                                          |
| 238021_s_at  | CRNDE      | ---      | colorectal neoplasia differentially expressed (non-protein coding)                                           |
| 242488_at    | ---        | ---      | ---                                                                                                          |
| 91952_at     | DCAF15     | 19p13.12 | DDB1 and CUL4 associated factor 15                                                                           |
| 207039_at    | CDKN2A     | 9p21.3   | cyclin-dependent kinase inhibitor 2A (melanoma, p16, inhibits CDK4)                                          |
| 212765_at    | CAMSAP1L1  | 1q32.1   | calmodulin regulated spectrin-associated protein 1-like 1                                                    |
| 218275_at    | SLC25A10   | 17q25.3  | solute carrier family 25 (mitochondrial carrier; dicarboxylate transporter), member 10                       |
| 221712_s_at  | WDR74      | 11q12.3  | WD repeat domain 74                                                                                          |
| 222317_at    | PDE3B      | 11p15.2  | phosphodiesterase 3B, cGMP-inhibited                                                                         |
| 223126_s_at  | C1orf21    | 1q25.3   | chromosome 1 open reading frame 21                                                                           |
| 224298_s_at  | UBAC2      | 13q32.3  | UBA domain containing 2                                                                                      |
| 225386_s_at  | HNRPLL     | 2p22.1   | heterogeneous nuclear ribonucleoprotein L-like                                                               |
| 230399_at    | ---        | ---      | ---                                                                                                          |
| 232271_at    | HNF4G      | 8q21.11  | hepatocyte nuclear factor 4, gamma                                                                           |
| 239010_at    | FLJ39632   | ---      | Hypothetical LOC642477                                                                                       |
| 242069_at    | CBX5       | 12q13.13 | chromobox homolog 5 (HP1 alpha homolog, Drosophila)                                                          |
| 1555487_a_at | ACTR3B     | 7q36.1   | ARP3 actin-related protein 3 homolog B (yeast) /// similar to actin-related protein 3-beta                   |
| 202961_s_at  | ATP5J2     | 7q22.1   | ATP synthase, H+ transporting, mitochondrial F0 complex, subunit F2                                          |
| 203458_at    | SPR        | 2p13.2   | sepiapterin reductase (7,8-dihydrobiopterin:NADP+ oxidoreductase)                                            |
| 203739_at    | ZNF217     | 20q13.2  | zinc finger protein 217                                                                                      |
| 204133_at    | RRP9       | 3p21.2   | ribosomal RNA processing 9, small subunit (SSU) processome component, homolog (yeast)                        |
| 204331_s_at  | MRPS12     | 19q13.2  | mitochondrial ribosomal protein S12                                                                          |
| 205543_at    | HSPA4L     | 4q28.1   | heat shock 70kDa protein 4-like                                                                              |
| 206545_at    | CD28       | 2q33.2   | CD28 molecule                                                                                                |
| 208226_x_at  | ADAM22     | 7q21.12  | ADAM metalloproteinase domain 22                                                                             |
| 208227_x_at  | ADAM22     | 7q21.12  | ADAM metalloproteinase domain 22                                                                             |
| 209478_at    | STRA13     | 17q25.3  | stimulated by retinoic acid 13 homolog (mouse)                                                               |
| 210115_at    | RPL39L     | 3q27.3   | ribosomal protein L39-like                                                                                   |
| 210378_s_at  | SSNA1      | 9q34.3   | Sjogren syndrome nuclear autoantigen 1                                                                       |
| 213906_at    | MYBL1      | 8q13.1   | v-myb myeloblastosis viral oncogene homolog (avian)-like 1                                                   |
| 218220_at    | C12orf10   | 12q13.13 | chromosome 12 open reading frame 10                                                                          |
| 218290_at    | PLEKHJ1    | 19p13.3  | pleckstrin homology domain containing, family J member 1                                                     |
| 218816_at    | LRRC1      | 6p12.1   | leucine rich repeat containing 1                                                                             |
| 220144_s_at  | ANKRD5     | 20p12.2  | ankyrin repeat domain 5                                                                                      |
| 221822_at    | CCDC101    | 16p11.2  | coiled-coil domain containing 101                                                                            |
| 223530_at    | TDRKH      | 1q21.3   | tudor and KH domain containing                                                                               |
| 224129_s_at  | DPY30      | 2p22.3   | dpy-30 homolog (C. elegans)                                                                                  |
| 226483_at    | TMEM68     | 8q12.1   | transmembrane protein 68                                                                                     |
| 226813_at    | C1orf57    | 1q42.2   | chromosome 1 open reading frame 57                                                                           |
| 242881_x_at  | ---        | ---      | ---                                                                                                          |
| 200844_s_at  | PRDX6      | 1q25.1   | peroxiredoxin 6                                                                                              |
| 201079_at    | SYNGR2     | 17q25.3  | synaptogyrin 2                                                                                               |
| 202024_at    | ASNA1      | 19p13.2  | arsA arsenite transporter, ATP-binding, homolog 1 (bacterial)                                                |
| 205172_x_at  | CLTB       | 5q35.2   | clathrin, light chain (Lcb)                                                                                  |
| 205826_at    | MYOM2      | 8p23.3   | myomesin (M-protein) 2, 165kDa                                                                               |
| 208237_x_at  | ADAM22     | 7q21.12  | ADAM metalloproteinase domain 22                                                                             |
| 208967_s_at  | AK2        | 1p35.1   | adenylate kinase 2                                                                                           |
| 209424_s_at  | AMACR      | 5p13.2   | alpha-methylacyl-CoA racemase                                                                                |
| 209425_at    | AMACR      | 5p13.2   | alpha-methylacyl-CoA racemase                                                                                |
| 209731_at    | NTHL1      | 16p13.3  | nth endonuclease III-like 1 (E. coli)                                                                        |
| 212727_at    | DLG3       | Xq13.1   | discs, large homolog 3 (Drosophila)                                                                          |
| 218336_at    | PFDN2      | 1q23.3   | prefoldin subunit 2                                                                                          |
| 219274_at    | TSPAN12    | 7q31.31  | tetraspanin 12                                                                                               |
| 223805_at    | OSBPL6     | 2q31.2   | oxysterol binding protein-like 6                                                                             |
| 225454_at    | CCDC124    | 19p13.11 | coiled-coil domain containing 124                                                                            |
| 228400_at    | SHROOM3    | 4q21.1   | shroom family member 3                                                                                       |
| 1554057_at   | LOC645676  | ---      | hypothetical LOC645676                                                                                       |
| 1558164_s_at | PEX13      | 2p16.1   | peroxisomal biogenesis factor 13                                                                             |
| 206284_x_at  | CLTB       | 5q35.2   | clathrin, light chain (Lcb)                                                                                  |
| 206506_s_at  | SUPT3H     | 6p21.1   | suppressor of Ty 3 homolog (S. cerevisiae)                                                                   |
| 206698_at    | XK         | Xp21.1   | X-linked Kx blood group (McLeod syndrome)                                                                    |
| 209213_at    | CBR1       | 21q22.12 | carbonyl reductase 1                                                                                         |
| 209864_at    | FRAT2      | 10q24.1  | frequently rearranged in advanced T-cell lymphomas 2                                                         |
| 210135_s_at  | SHOX2      | 3q25.32  | short stature homeobox 2                                                                                     |
| 214582_at    | PDE3B      | 11p15.2  | phosphodiesterase 3B, cGMP-inhibited                                                                         |
| 216593_s_at  | LOC1002898 | ---      | similar to phosphatidylinositol glycan, class C /// phosphatidylinositol glycan anchor biosynthesis, class C |
|              | 48         |          |                                                                                                              |

|              |             |                |                                                                                          |
|--------------|-------------|----------------|------------------------------------------------------------------------------------------|
| 217771_at    | GOLM1       | 9q21.33        | golgi membrane protein 1                                                                 |
| 222994_at    | PRDX5       | 11q13.1        | peroxiredoxin 5                                                                          |
| 225193_at    | ---         | ---            | ---                                                                                      |
| 225308_s_at  | TANC1       | 2q24.2         | tetratricopeptide repeat, ankyrin repeat and coiled-coil containing 1                    |
| 226458_at    | ---         | ---            | ---                                                                                      |
| 226727_at    | CISD3       | 17q12          | CDGSH iron sulfur domain 3                                                               |
| 239989_at    | CNTLN       | 9p22.2         | centlein, centrosomal protein                                                            |
| 1556194_a_at | ---         | ---            | ---                                                                                      |
| 201563_at    | SORD        | 15q21.1        | sorbitol dehydrogenase                                                                   |
| 201929_s_at  | PKP4        | 2q24.1         | plakophilin 4                                                                            |
| 203234_at    | UPP1        | 7p12.3         | uridine phosphorylase 1                                                                  |
| 203452_at    | B3GAT3      | 11q12.3        | beta-1,3-glucuronyltransferase 3 (glucuronosyltransferase I)                             |
| 204068_at    | STK3        | Xq26.2         | serine/threonine kinase 3 (STE20 homolog, yeast)                                         |
| 207831_x_at  | DHPS        | 19p13.2        | deoxyhypusine synthase                                                                   |
| 209426_s_at  | AMACR       | 5p13.2         | alpha-methylacyl-CoA racemase                                                            |
| 209567_at    | RRS1        | 8q13.1         | RRS1 ribosome biogenesis regulator homolog (S. cerevisiae)                               |
| 211471_s_at  | RAB36       | 22q11.22       | RAB36, member RAS oncogene family                                                        |
| 214596_at    | CHRM3       | 1q43           | cholinergic receptor, muscarinic 3                                                       |
| 214706_at    | ZNF200      | 16p13.3        | zinc finger protein 200                                                                  |
| 217485_x_at  | PMS2L1      | 7q22.1         | postmeiotic segregation increased 2-like 1 pseudogene                                    |
| 218688_at    | DAK         | 11q12.2        | dihydroxyacetone kinase 2 homolog (S. cerevisiae)                                        |
| 220942_x_at  | FAM162A     | 3q21.1         | family with sequence similarity 162, member A                                            |
| 224855_at    | LEFTY1      | 1q42.12        | left-right determination factor 1 /// pyrroline-5-carboxylate reductase family, member 2 |
| 225861_at    | C16orf14    | ---            | chromosome 16 open reading frame 14                                                      |
| 225997_at    | MOBK1A      | 4q13.3         | MOB1, Mps One Binder kinase activator-like 1A (yeast)                                    |
| 231882_at    | FLJ39632    | ---            | hypothetical LOC642477                                                                   |
| 232101_s_at  | PIGN        | 18q21.33       | phosphatidylinositol glycan anchor biosynthesis, class N                                 |
| 242546_at    | FLJ39632    | ---            | hypothetical LOC642477                                                                   |
| 1560371_at   | LOC401321   | ---            | hypothetical LOC401321                                                                   |
| 204756_at    | MAP2K5      | 15q23          | mitogen-activated protein kinase kinase 5                                                |
| 205164_at    | GCAT        | 22q13.1        | glycine C-acetyltransferase (2-amino-3-ketobutyrate coenzyme A ligase)                   |
| 208369_s_at  | GCDH        | 19p13.2        | glutaryl-Coenzyme A dehydrogenase                                                        |
| 214958_s_at  | TMC6        | 17q25.3        | transmembrane channel-like 6                                                             |
| 219431_at    | ARHGAP10    | 4q31.23        | Rho GTPase activating protein 10                                                         |
| 227103_s_at  | ECE2        | 3q27.1         | endothelin converting enzyme 2                                                           |
| 1553715_s_at | C16orf14    | ---            | chromosome 16 open reading frame 14                                                      |
| 1557331_at   | POLR1B      | 2q13           | polymerase (RNA) I polypeptide B, 128kDa                                                 |
| 208907_s_at  | MRPS18B     | HSCHR6_MHC_MCF | mitochondrial ribosomal protein S18B                                                     |
| 209449_at    | LSM2        | HSCHR6_MHC_APD | LSM2 homolog, U6 small nuclear RNA associated (S. cerevisiae)                            |
| 217871_s_at  | MIF         | 22q11.23       | macrophage migration inhibitory factor (glycosylation-inhibiting factor)                 |
| 217894_at    | KCTD3       | 1q41           | potassium channel tetramerisation domain containing 3                                    |
| 218996_at    | TFPT        | 19q13.42       | TCF3 (E2A) fusion partner (in childhood Leukemia)                                        |
| 220459_at    | MCM3APAS    | 21q22.3        | MCM3AP antisense RNA (non-protein coding)                                                |
| 223993_s_at  | CNIH4       | 1q42.11        | cornichon homolog 4 (Drosophila)                                                         |
| 224823_at    | MYLK        | 3q21.1         | myosin light chain kinase                                                                |
| 230298_at    | MBLAC2      | 5q14.3         | metallo-beta-lactamase domain containing 2                                               |
| 233746_x_at  | C15orf63    | 15q15.3        | chromosome 15 open reading frame 63 /// small EDRK-rich factor 2                         |
| 1559633_a_at | CHRM3       | 1q43           | cholinergic receptor, muscarinic 3                                                       |
| 1568612_at   | GABRG2      | 5q34           | gamma-aminobutyric acid (GABA) A receptor, gamma 2                                       |
| 202555_s_at  | MYLK        | 3q21.1         | myosin light chain kinase                                                                |
| 207543_s_at  | P4HA1       | 10q22.1        | prolyl 4-hydroxylase, alpha polypeptide I                                                |
| 213321_at    | BCKDHB      | 6q14.1         | branched chain keto acid dehydrogenase E1, beta polypeptide                              |
| 214614_at    | MNX1        | 7q36.3         | motor neuron and pancreas homeobox 1                                                     |
| 218728_s_at  | CNIH4       | 1q42.11        | cornichon homolog 4 (Drosophila)                                                         |
| 225904_at    | C1orf96     | 1q42.13        | chromosome 1 open reading frame 96                                                       |
| 227421_at    | C21orf57    | 21q22.3        | chromosome 21 open reading frame 57                                                      |
| 227864_s_at  | FAM125A     | 19p13.11       | family with sequence similarity 125, member A                                            |
| 231102_at    | CROT        | 7q21.12        | carnitine O-octanoyltransferase                                                          |
| 231319_x_at  | KIF9        | 3p21.31        | kinesin family member 9                                                                  |
| 241749_at    | MURC        | 9q31.1         | muscle-related coiled-coil protein                                                       |
| 202785_at    | NDUFA7      | 19p13.2        | NADH dehydrogenase (ubiquinone) 1 alpha subcomplex, 7, 14.5kDa                           |
| 202802_at    | DHPS        | 19p13.2        | deoxyhypusine synthase                                                                   |
| 203819_s_at  | IGF2BP3     | 7p15.3         | insulin-like growth factor 2 mRNA binding protein 3                                      |
| 207480_s_at  | MEIS2       | 15q14          | Meis homeobox 2                                                                          |
| 217289_s_at  | SLC37A4     | 11q23.3        | solute carrier family 37 (glucose-6-phosphate transporter), member 4                     |
| 219733_s_at  | SLC27A5     | 19q13.43       | solute carrier family 27 (fatty acid transporter), member 5                              |
| 225657_at    | LOC152217   | ---            | hypothetical LOC152217                                                                   |
| 226453_at    | RNASEH2C    | 11q13.1        | ribonuclease H2, subunit C                                                               |
| 228066_at    | C17orf96    | 17q12          | chromosome 17 open reading frame 96                                                      |
| 239552_at    | VWDE        | 7p21.3         | von Willebrand factor D and EGF domains                                                  |
| 240185_at    | LOC10014773 | ---            | hypothetical LOC10014773                                                                 |
| 203025_at    | ARD1A       | ---            | ARD1 homolog A, N-acetyltransferase (S. cerevisiae)                                      |
| 205677_s_at  | DLEU1       | 13q14.2        | deleted in lymphocytic leukemia 1 (non-protein coding)                                   |
| 209507_at    | RPA3        | 7p21.3         | replication protein A3, 14kDa                                                            |
| 209942_x_at  | MAGEA3      | Xq28           | melanoma antigen family A, 3                                                             |

|              |              |          |                                                                                                                                                                                                                         |
|--------------|--------------|----------|-------------------------------------------------------------------------------------------------------------------------------------------------------------------------------------------------------------------------|
| 213411_at    | ---          | ---      | ---                                                                                                                                                                                                                     |
| 214612_x_at  | MAGEA6       | Xq28     | melanoma antigen family A, 6                                                                                                                                                                                            |
| 215812_s_at  | LOC653562    | ---      | similar to solute carrier family 6 member 8 /// solute carrier family 6 (neurotransmitter transporter, creatine), member 10 (pseudogene) /// solute carrier family 6 (neurotransmitter transporter, creatine), member 8 |
| 219072_at    | BCL7C        | 16p11.2  | B-cell CLL/lymphoma 7C                                                                                                                                                                                                  |
| 221692_s_at  | MRPL34       | 19p13.11 | mitochondrial ribosomal protein L34                                                                                                                                                                                     |
| 226609_at    | DCBLD1       | 6q22.1   | discoidin, CUB and LCCL domain containing 1                                                                                                                                                                             |
| 226780_s_at  | C7orf55      | 7q34     | chromosome 7 open reading frame 55                                                                                                                                                                                      |
| 230769_at    | DENND2C      | 1p13.2   | DENN/MADD domain containing 2C                                                                                                                                                                                          |
| 204483_at    | ENO3         | 17p13.2  | enolase 3 (beta, muscle)                                                                                                                                                                                                |
| 206950_at    | SCN9A        | 2q24.3   | sodium channel, voltage-gated, type IX, alpha subunit                                                                                                                                                                   |
| 210587_at    | INHBE        | 12q13.3  | inhibin, beta E                                                                                                                                                                                                         |
| 213079_at    | TSR2         | Xp11.22  | TSR2, 20S rRNA accumulation, homolog (S. cerevisiae)                                                                                                                                                                    |
| 221058_s_at  | CKLF         | 16q21    | chemokine-like factor                                                                                                                                                                                                   |
| 223253_at    | EPDR1        | 7p14.1   | ependymin related protein 1 (zebrafish)                                                                                                                                                                                 |
| 224448_s_at  | C6orf125     | 6p21.31  | chromosome 6 open reading frame 125                                                                                                                                                                                     |
| 224666_at    | NSMCE1       | 16p12.1  | non-SMC element 1 homolog (S. cerevisiae)                                                                                                                                                                               |
| 227256_at    | USP31        | 16p12.2  | ubiquitin specific peptidase 31                                                                                                                                                                                         |
| 228355_s_at  | NDUFAF2      | 5q12.1   | NADH dehydrogenase (ubiquinone) 1 alpha subcomplex, assembly factor 2                                                                                                                                                   |
| 230434_at    | PHOSPHO2     | 2q31.1   | phosphatase, orphan 2                                                                                                                                                                                                   |
| 231423_s_at  | ANKRD16      | 10p15.1  | ankyrin repeat domain 16                                                                                                                                                                                                |
| 206070_s_at  | EPHA3        | 3p11.1   | EPH receptor A3                                                                                                                                                                                                         |
| 208704_x_at  | APLP2        | 11q24.3  | amyloid beta (A4) precursor-like protein 2                                                                                                                                                                              |
| 208760_at    | UBE2I        | 16p13.3  | Ubiquitin-conjugating enzyme E2I (UBC9 homolog, yeast)                                                                                                                                                                  |
| 209781_s_at  | KHDRBS3      | 8q24.23  | KH domain containing, RNA binding, signal transduction associated 3                                                                                                                                                     |
| 220993_s_at  | GPR63        | 6q16.1   | G protein-coupled receptor 63                                                                                                                                                                                           |
| 225882_at    | SLC35B4      | 7q33     | solute carrier family 35, member B4                                                                                                                                                                                     |
| 226285_at    | CAPRIN1      | 11p13    | cell cycle associated protein 1                                                                                                                                                                                         |
| 226460_at    | FNIP2        | 4q32.1   | folliculin interacting protein 2                                                                                                                                                                                        |
| 227174_at    | WDR72        | 15q21.3  | WD repeat domain 72                                                                                                                                                                                                     |
| 228619_x_at  | TIPRL        | 1q24.2   | TIP41, TOR signaling pathway regulator-like (S. cerevisiae)                                                                                                                                                             |
| 229796_at    | SIX4         | 14q23.1  | SIX homeobox 4                                                                                                                                                                                                          |
| 230257_s_at  | TSEN15       | 1q25.3   | tRNA splicing endonuclease 15 homolog (S. cerevisiae)                                                                                                                                                                   |
| 238022_at    | CRNDE        | ---      | colorectal neoplasia differentially expressed (non-protein coding)                                                                                                                                                      |
| 240280_at    | UFSP1        | 7q22.1   | UFM1-specific peptidase 1 (non-functional)                                                                                                                                                                              |
| 1553587_a_at | POLE4        | 2p12     | polymerase (DNA-directed), epsilon 4 (p12 subunit)                                                                                                                                                                      |
| 203771_s_at  | BLVRA        | 7p13     | biliverdin reductase A                                                                                                                                                                                                  |
| 205830_at    | CLGN         | 4q31.1   | calmegin                                                                                                                                                                                                                |
| 207307_at    | HTR2C        | Xq23     | 5-hydroxytryptamine (serotonin) receptor 2C                                                                                                                                                                             |
| 207663_x_at  | GAGE3        | Xp11.23  | G antigen 3                                                                                                                                                                                                             |
| 219260_s_at  | C17orf81     | 17p13.1  | chromosome 17 open reading frame 81                                                                                                                                                                                     |
| 220040_x_at  | ZC4H2        | Xq11.2   | zinc finger, C4H2 domain containing                                                                                                                                                                                     |
| 221558_s_at  | LEF1         | 4q25     | lymphoid enhancer-binding factor 1                                                                                                                                                                                      |
| 226231_at    | ---          | ---      | ---                                                                                                                                                                                                                     |
| 228116_at    | ---          | ---      | ---                                                                                                                                                                                                                     |
| 238728_at    | ---          | ---      | ---                                                                                                                                                                                                                     |
| 201221_s_at  | SNRNP70      | 19q13.33 | small nuclear ribonucleoprotein 70kDa (U1)                                                                                                                                                                              |
| 208248_x_at  | APLP2        | 11q24.3  | amyloid beta (A4) precursor-like protein 2                                                                                                                                                                              |
| 210467_x_at  | MAGEA12      | Xq28     | melanoma antigen family A, 12                                                                                                                                                                                           |
| 218201_at    | NDUFB2       | 7q34     | NADH dehydrogenase (ubiquinone) 1 beta subcomplex, 2, 8kDa                                                                                                                                                              |
| 221849_s_at  | DCAF15       | 19p13.12 | DDB1 and CUL4 associated factor 15                                                                                                                                                                                      |
| 224387_at    | COMMD5       | 8q24.3   | COMM domain containing 5                                                                                                                                                                                                |
| 225924_at    | FNIP2        | 4q32.1   | folliculin interacting protein 2                                                                                                                                                                                        |
| 226558_at    | LOC389834    | ---      | ankyrin repeat domain 57 pseudogene                                                                                                                                                                                     |
| 231952_at    | ---          | ---      | ---                                                                                                                                                                                                                     |
| 239069_s_at  | ---          | ---      | ---                                                                                                                                                                                                                     |
| 202975_s_at  | RHOBTB3      | 5q15     | Rho-related BTB domain containing 3                                                                                                                                                                                     |
| 207325_x_at  | MAGEA1       | Xq28     | melanoma antigen family A, 1 (directs expression of antigen MZ2-E)                                                                                                                                                      |
| 209511_at    | POLR2F       | 22q13.1  | polymerase (RNA) II (DNA directed) polypeptide F                                                                                                                                                                        |
| 213587_s_at  | ATP6VOE2     | 7q36.1   | ATPase, H+ transporting VO subunit e2                                                                                                                                                                                   |
| 214642_x_at  | MAGEA5       | Xq28     | melanoma antigen family A, 5                                                                                                                                                                                            |
| 219161_s_at  | CKLF         | 16q21    | chemokine-like factor                                                                                                                                                                                                   |
| 221526_x_at  | PARD3        | 10p11.21 | par-3 partitioning defective 3 homolog (C. elegans)                                                                                                                                                                     |
| 224890_s_at  | C7orf59      | 7q22.1   | chromosome 7 open reading frame 59                                                                                                                                                                                      |
| 225202_at    | RHOBTB3      | 5q15     | Rho-related BTB domain containing 3                                                                                                                                                                                     |
| 235443_at    | LOC100131067 | ---      | hypothetical protein LOC100131067                                                                                                                                                                                       |
| 203820_s_at  | IGF2BP3      | 7p15.3   | insulin-like growth factor 2 mRNA binding protein 3                                                                                                                                                                     |
| 204066_s_at  | AGAP1        | 2q37.2   | ArfGAP with GTPase domain, ankyrin repeat and PH domain 1                                                                                                                                                               |
| 204238_s_at  | C6orf108     | 6p21.1   | chromosome 6 open reading frame 108                                                                                                                                                                                     |
| 208155_x_at  | GAGE1        | Xp11.23  | G antigen 1 /// G antigen 12F /// G antigen 12G /// G antigen 12I /// G antigen 12J /// G antigen 4 /// G antigen 5 /// G antigen 6 /// G antigen 7                                                                     |
| 211674_x_at  | CTAG1A       | Xq28     | cancer/testis antigen 1A /// cancer/testis antigen 1B                                                                                                                                                                   |
| 213012_at    | NEDD4        | 15q21.3  | neural precursor cell expressed, developmentally down-regulated 4                                                                                                                                                       |
| 221272_s_at  | C1orf21      | 1q25.3   | chromosome 1 open reading frame 21                                                                                                                                                                                      |
| 229415_at    | CYCS         | 7p15.3   | cytochrome c, somatic                                                                                                                                                                                                   |

|              |            |          |                                                                                                     |
|--------------|------------|----------|-----------------------------------------------------------------------------------------------------|
| 229517_at    | PTPDC1     | 9q22.32  | protein tyrosine phosphatase domain containing 1                                                    |
| 230738_at    | LOC730631  | ---      | Hypothetical LOC730631                                                                              |
| 1557070_at   | ---        | ---      | ---                                                                                                 |
| 1568780_at   | LOC649305  | ---      | hypothetical LOC649305                                                                              |
| 202903_at    | LSM5       | 7p14.3   | LSM5 homolog, U6 small nuclear RNA associated ( <i>S. cerevisiae</i> )                              |
| 204364_s_at  | REEP1      | 2p11.2   | receptor accessory protein 1                                                                        |
| 208235_x_at  | GAGE12F    | Xp11.23  | G antigen 12F /// G antigen 12G /// G antigen 12I /// G antigen 7                                   |
| 211025_x_at  | COX5B      | 2q11.2   | cytochrome c oxidase subunit Vb                                                                     |
| 214079_at    | DHRS2      | 14q11.2  | dehydrogenase/reductase (SDR family) member 2                                                       |
| 219345_at    | BOLA1      | 1q21.2   | bolA homolog 1 ( <i>E. coli</i> )                                                                   |
| 225359_at    | DNAJC19    | 3q26.33  | DnaJ (Hsp40) homolog, subfamily C, member 19                                                        |
| 225464_at    | FRMD6      | 14q22.1  | FERM domain containing 6                                                                            |
| 227798_at    | SMAD1      | 4q31.21  | SMAD family member 1                                                                                |
| 228053_s_at  | TOMM5      | 9p13.2   | translocase of outer mitochondrial membrane 5 homolog (yeast)                                       |
| 230158_at    | DPY19L2    | 7p14.2   | dpy-19-like 2 ( <i>C. elegans</i> )                                                                 |
| 236514_at    | ACOT8      | 20q13.12 | acyl-CoA thioesterase 8                                                                             |
| 1557174_a_at | ---        | ---      | ---                                                                                                 |
| 201259_s_at  | SYPL1      | 7q22.3   | synaptophysin-like 1                                                                                |
| 207714_s_at  | SERPINH1   | 11q13.5  | serpin peptidase inhibitor, clade H (heat shock protein 47), member 1, (collagen binding protein 1) |
| 215733_x_at  | CTAG2      | Xq28     | cancer/testis antigen 2                                                                             |
| 225802_at    | TOP1MT     | 8q24.3   | topoisomerase (DNA) I, mitochondrial                                                                |
| 226360_at    | ZNRF3      | 22q12.1  | zinc and ring finger 3                                                                              |
| 228977_at    | LOC729680  | ---      | hypothetical protein LOC729680                                                                      |
| 229826_at    | LOC440957  | ---      | similar to CG32736-PA                                                                               |
| 235147_at    | FLJ32063   | ---      | Hypothetical LOC150538                                                                              |
| 236989_at    | ---        | ---      | ---                                                                                                 |
| 202932_at    | YES1       | 18p11.32 | v-yes-1 Yamaguchi sarcoma viral oncogene homolog 1                                                  |
| 203627_at    | IGF1R      | 15q26.3  | insulin-like growth factor 1 receptor                                                               |
| 204979_s_at  | SH3BGR     | 21q22.2  | SH3 domain binding glutamic acid-rich protein                                                       |
| 205354_at    | GAMT       | 19p13.3  | guanidinoacetate N-methyltransferase                                                                |
| 213194_at    | ROBO1      | 3p12.2   | roundabout, axon guidance receptor, homolog 1 ( <i>Drosophila</i> )                                 |
| 219474_at    | C3orf52    | 3q13.2   | chromosome 3 open reading frame 52                                                                  |
| 225065_x_at  | NCRNA00188 | 17p11.2  | non-protein coding RNA 188                                                                          |
| 226433_at    | RNF157     | 17q25.1  | ring finger protein 157                                                                             |
| 227921_at    | ---        | ---      | ---                                                                                                 |
| 232010_at    | FSTL5      | 4q32.2   | follicle-stimulating factor-like 5                                                                  |
| 64900_at     | FLJ22167   | ---      | hypothetical protein FLJ22167                                                                       |
| 1557215_at   | ---        | ---      | ---                                                                                                 |
| 1562099_at   | ---        | ---      | ---                                                                                                 |
| 200085_s_at  | TCEB2      | 16p13.3  | transcription elongation factor B (SIII), polypeptide 2 (18kDa, elongin B)                          |
| 202260_s_at  | STXBP1     | 9q34.11  | syntaxin binding protein 1                                                                          |
| 206394_at    | MYBPC2     | 19q13.33 | myosin binding protein C, fast type                                                                 |
| 207717_s_at  | PKP2       | 12p11.21 | plakophilin 2                                                                                       |
| 207874_s_at  | CFHR4      | 1q31.3   | complement factor H-related 4                                                                       |
| 210993_s_at  | SMAD1      | 4q31.21  | SMAD family member 1                                                                                |
| 212353_at    | SULF1      | 8q13.2   | sulfatase 1                                                                                         |
| 222772_at    | MYEF2      | 15q21.1  | myelin expression factor 2                                                                          |
| 225189_s_at  | RAPH1      | 2q33.2   | Ras association (RalGDS/AF-6) and pleckstrin homology domains 1                                     |
| 228365_at    | CPNE8      | 12q12    | copine VIII                                                                                         |
| 235532_at    | ---        | ---      | ---                                                                                                 |
| 202431_s_at  | MYC        | 8q24.21  | v-myc myelocytomatosis viral oncogene homolog (avian)                                               |
| 202976_s_at  | RHOBTB3    | 5q15     | Rho-related BTB domain containing 3                                                                 |
| 210125_s_at  | BANF1      | 11q13.1  | barrier to autointegration factor 1                                                                 |
| 214857_at    | ---        | ---      | ---                                                                                                 |
| 218862_at    | ASB13      | 10p15.1  | ankyrin repeat and SOCS box-containing 13                                                           |
| 223451_s_at  | CKLF       | 16q21    | chemokine-like factor                                                                               |
| 241367_at    | TEX19      | 17q25.3  | testis expressed 19                                                                                 |
| 1558139_at   | FLJ39632   | ---      | hypothetical LOC642477 /// hypothetical LOC400879                                                   |
| 1569469_a_at | LHX8       | 1p31.1   | LIM homeobox 8                                                                                      |
| 209867_s_at  | LPHN3      | 4q13.1   | latrophilin 3                                                                                       |
| 210546_x_at  | CTAG1A     | Xq28     | cancer/testis antigen 1A /// cancer/testis antigen 1B                                               |
| 211425_x_at  | SSX4       | Xp11.23  | synovial sarcoma, X breakpoint 4 /// synovial sarcoma, X breakpoint 4B                              |
| 212148_at    | PBX1       | 1q23.3   | pre-B-cell leukemia homeobox 1                                                                      |
| 212891_s_at  | GADD45GIP1 | 19p13.2  | growth arrest and DNA-damage-inducible, gamma interacting protein 1                                 |
| 218161_s_at  | CLN6       | 15q23    | ceroid-lipofuscinosis, neuronal 6, late infantile, variant                                          |
| 218326_s_at  | LGR4       | 11p14.1  | leucine-rich repeat-containing G protein-coupled receptor 4                                         |
| 218847_at    | IGF2BP2    | 3q27.2   | insulin-like growth factor 2 mRNA binding protein 2                                                 |
| 224741_x_at  | GAS5       | 1q25.1   | growth arrest-specific 5 (non-protein coding)                                                       |
| 224841_x_at  | GAS5       | 1q25.1   | growth arrest-specific 5 (non-protein coding)                                                       |
| 224955_at    | TEAD1      | 11p15.3  | TEA domain family member 1 (SV40 transcriptional enhancer factor)                                   |
| 227579_at    | ---        | ---      | ---                                                                                                 |
| 230701_x_at  | KIF9       | 3p21.31  | kinesin family member 9                                                                             |
| 1553972_a_at | CBS        | 21q22.3  | cystathionine-beta-synthase                                                                         |
| 206435_at    | B4GALNT1   | 12q13.3  | beta-1,4-N-acetylgalactosaminyl transferase 1                                                       |

|              |              |          |                                                                                                                                                                                                                                                                          |
|--------------|--------------|----------|--------------------------------------------------------------------------------------------------------------------------------------------------------------------------------------------------------------------------------------------------------------------------|
| 209066_x_at  | UQCRB        | 8q22.1   | ubiquinol-cytochrome c reductase binding protein                                                                                                                                                                                                                         |
| 212254_s_at  | DST          | 6p12.1   | dystonin                                                                                                                                                                                                                                                                 |
| 212816_s_at  | CBS          | 21q22.3  | cystathionine-beta-synthase                                                                                                                                                                                                                                              |
| 224916_at    | TMEM173      | 5q31.2   | transmembrane protein 173                                                                                                                                                                                                                                                |
| 227688_at    | LRCH2        | Xq23     | leucine-rich repeats and calponin homology (CH) domain containing 2                                                                                                                                                                                                      |
| 229090_at    | LOC220930    | ---      | hypothetical LOC220930                                                                                                                                                                                                                                                   |
| 206640_x_at  | GAGE12C      | Xp11.23  | G antigen 12C /// G antigen 12D /// G antigen 12E /// G antigen 12F /// G antigen 12G /// G antigen 12H /// G antigen 12I /// G antigen 2A /// G antigen 2C /// G antigen 4 /// G antigen 5 /// G antigen 6 /// G antigen 7                                              |
| 218644_at    | PLEK2        | 14q23.3  | pleckstrin 2                                                                                                                                                                                                                                                             |
| 224929_at    | TMEM173      | 5q31.2   | transmembrane protein 173                                                                                                                                                                                                                                                |
| 231914_at    | NUDT14       | 14q32.33 | nudix (nucleoside diphosphate linked moiety X)-type motif 14                                                                                                                                                                                                             |
| 239155_at    | ---          | ---      | ---                                                                                                                                                                                                                                                                      |
| 239319_at    | LOC728342    | ---      | Hypothetical protein LOC728342                                                                                                                                                                                                                                           |
| 239834_at    | ---          | ---      | ---                                                                                                                                                                                                                                                                      |
| 205433_at    | BCHE         | 3q26.1   | butyrylcholinesterase                                                                                                                                                                                                                                                    |
| 206204_at    | GRB14        | 2q24.3   | growth factor receptor-bound protein 14                                                                                                                                                                                                                                  |
| 210437_at    | MAGEA9       | Xq28     | melanoma antigen family A, 9 /// melanoma antigen family A, 9B                                                                                                                                                                                                           |
| 210852_s_at  | AASS         | 7q31.32  | aminoadipate-semialdehyde synthase                                                                                                                                                                                                                                       |
| 221884_at    | MECOM        | 3q26.2   | MDS1 and EVI1 complex locus                                                                                                                                                                                                                                              |
| 223378_at    | GLIS2        | 16p13.3  | GLIS family zinc finger 2                                                                                                                                                                                                                                                |
| 225603_s_at  | C8orf83      | 8q22.1   | chromosome 8 open reading frame 83                                                                                                                                                                                                                                       |
| 226545_at    | CD109        | 6q13     | CD109 molecule                                                                                                                                                                                                                                                           |
| 227053_at    | PACSIN1      | 6p21.31  | protein kinase C and casein kinase substrate in neurons 1                                                                                                                                                                                                                |
| 229464_at    | MYEF2        | 15q21.1  | myelin expression factor 2                                                                                                                                                                                                                                               |
| 244080_at    | LOC100287039 | ---      | hypothetical protein LOC100287039                                                                                                                                                                                                                                        |
| 244114_x_at  | ---          | ---      | ---                                                                                                                                                                                                                                                                      |
| 204560_at    | FKBP5        | 6p21.31  | FK506 binding protein 5                                                                                                                                                                                                                                                  |
| 205450_at    | PHKA1        | Xq13.2   | phosphorylase kinase, alpha 1 (muscle)                                                                                                                                                                                                                                   |
| 228049_x_at  | ---          | ---      | ---                                                                                                                                                                                                                                                                      |
| 228523_at    | NANOS1       | 10q26.11 | nanos homolog 1 (Drosophila)                                                                                                                                                                                                                                             |
| 217339_x_at  | CTAG1A       | Xq28     | cancer/testis antigen 1A /// cancer/testis antigen 1B                                                                                                                                                                                                                    |
| 225731_at    | ANKRD50      | 4q28.1   | ankyrin repeat domain 50                                                                                                                                                                                                                                                 |
| 235207_at    | ---          | ---      | ---                                                                                                                                                                                                                                                                      |
| 203917_at    | CXADR        | 21q21.1  | coxsackie virus and adenovirus receptor                                                                                                                                                                                                                                  |
| 208791_at    | CLU          | 8p21.1   | clusterin                                                                                                                                                                                                                                                                |
| 224560_at    | TIMP2        | 17q25.3  | TIMP metalloproteinase inhibitor 2                                                                                                                                                                                                                                       |
| 226374_at    | ---          | ---      | ---                                                                                                                                                                                                                                                                      |
| 226781_at    | C7orf55      | 7q34     | chromosome 7 open reading frame 55                                                                                                                                                                                                                                       |
| 205551_at    | SV2B         | 15q26.1  | synaptic vesicle glycoprotein 2B                                                                                                                                                                                                                                         |
| 205774_at    | F12          | 5q35.3   | coagulation factor XII (Hageman factor)                                                                                                                                                                                                                                  |
| 209325_s_at  | RGS16        | 1q25.3   | regulator of G-protein signaling 16                                                                                                                                                                                                                                      |
| 210094_s_at  | PAR3         | 10p11.21 | par-3 partitioning defective 3 homolog (C. elegans)                                                                                                                                                                                                                      |
| 213155_at    | WSCD1        | 17p13.2  | WSC domain containing 1                                                                                                                                                                                                                                                  |
| 214254_at    | MAGEA4       | Xq28     | melanoma antigen family A, 4                                                                                                                                                                                                                                             |
| 220771_at    | LOC51152     | ---      | melanoma antigen                                                                                                                                                                                                                                                         |
| 225354_s_at  | SH3BGRL2     | 6q14.1   | SH3 domain binding glutamic acid-rich protein like 2                                                                                                                                                                                                                     |
| 226837_at    | SPRED1       | 15q14    | sprouty-related, EVH1 domain containing 1                                                                                                                                                                                                                                |
| 1553441_at   | CNTNAP4      | 16q23.1  | contactin associated protein-like 4                                                                                                                                                                                                                                      |
| 207739_s_at  | GAGE1        | Xp11.23  | G antigen 1 /// G antigen 12F /// G antigen 12G /// G antigen 12I /// G antigen 12J /// G antigen 2A /// G antigen 2B /// G antigen 2C /// G antigen 2D /// G antigen 2E /// G antigen 3 /// G antigen 4 /// G antigen 5 /// G antigen 6 /// G antigen 7 /// G antigen 8 |
| 219738_s_at  | PCDH9        | 13q21.32 | protocadherin 9                                                                                                                                                                                                                                                          |
| 222810_s_at  | RASAL2       | 1q25.2   | RAS protein activator like 2                                                                                                                                                                                                                                             |
| 226707_at    | NAPRT1       | 8q24.3   | nicotinate phosphoribosyltransferase domain containing 1                                                                                                                                                                                                                 |
| 236741_at    | WDR72        | 15q21.3  | WD repeat domain 72                                                                                                                                                                                                                                                      |
| 215016_x_at  | DST          | 6p12.1   | dystonin                                                                                                                                                                                                                                                                 |
| 218029_at    | FAM65A       | 16q22.1  | family with sequence similarity 65, member A                                                                                                                                                                                                                             |
| 223949_at    | TMPRSS3      | 21q22.3  | transmembrane protease, serine 3                                                                                                                                                                                                                                         |
| 229900_at    | CD109        | 6q13     | CD109 molecule                                                                                                                                                                                                                                                           |
| 233814_at    | EFNA5        | 5q21.3   | ephrin-A5                                                                                                                                                                                                                                                                |
| 1555579_s_at | PTPRM        | 18p11.23 | protein tyrosine phosphatase, receptor type, M                                                                                                                                                                                                                           |
| 202022_at    | ALDOC        | 17q11.2  | aldolase C, fructose-bisphosphate                                                                                                                                                                                                                                        |
| 203773_x_at  | BLVRA        | 7p13     | biliverdin reductase A                                                                                                                                                                                                                                                   |
| 203854_at    | CFI          | 4q25     | complement factor I                                                                                                                                                                                                                                                      |
| 207808_s_at  | PROS1        | 3q11.1   | protein S (alpha)                                                                                                                                                                                                                                                        |
| 210480_s_at  | MYO6         | 6q14.1   | myosin VI                                                                                                                                                                                                                                                                |
| 212686_at    | PPM1H        | 12q14.2  | protein phosphatase 1H (PP2C domain containing)                                                                                                                                                                                                                          |
| 214608_s_at  | EYA1         | 8q13.3   | eyes absent homolog 1 (Drosophila)                                                                                                                                                                                                                                       |
| 228274_at    | SDSL         | 12q24.13 | serine dehydratase-like                                                                                                                                                                                                                                                  |
| 1554459_s_at | CFHR3        | 1q31.3   | complement factor H-related 3                                                                                                                                                                                                                                            |
| 210394_x_at  | SSX4         | Xp11.23  | synovial sarcoma, X breakpoint 4 /// synovial sarcoma, X breakpoint 4B                                                                                                                                                                                                   |
| 210497_x_at  | SSX2         | Xp11.22  | synovial sarcoma, X breakpoint 2                                                                                                                                                                                                                                         |
| 211432_s_at  | TYRO3        | 15q15.1  | TYRO3 protein tyrosine kinase                                                                                                                                                                                                                                            |
| 212151_at    | PBX1         | 1q23.3   | pre-B-cell leukemia homeobox 1                                                                                                                                                                                                                                           |

|              |              |                |                                                                                                                                                                                                                         |
|--------------|--------------|----------------|-------------------------------------------------------------------------------------------------------------------------------------------------------------------------------------------------------------------------|
| 219368_at    | NAP1L2       | Xq13.2         | nucleosome assembly protein 1-like 2                                                                                                                                                                                    |
| 225481_at    | FRMD6        | 14q22.1        | FERM domain containing 6                                                                                                                                                                                                |
| 227491_at    | ---          | ---            | ---                                                                                                                                                                                                                     |
| 227917_at    | FAM85A       | ---            | family with sequence similarity 85, member A                                                                                                                                                                            |
| 1555564_a_at | CFI          | 4q25           | complement factor I                                                                                                                                                                                                     |
| 201841_s_at  | HSPB1        | 7q11.23        | heat shock 27kDa protein 1                                                                                                                                                                                              |
| 202620_s_at  | PLOD2        | 3q24           | procollagen-lysine, 2-oxoglutarate 5-dioxygenase 2                                                                                                                                                                      |
| 204749_at    | NAP1L3       | Xq21.32        | nucleosome assembly protein 1-like 3                                                                                                                                                                                    |
| 205123_s_at  | TMEFF1       | 9q31.1         | transmembrane protein with EGF-like and two follistatin-like domains 1                                                                                                                                                  |
| 207156_at    | HIST1H2AG    | 6p22.1         | histone cluster 1, H2ag                                                                                                                                                                                                 |
| 233514_x_at  | TEX11        | Xq13.1         | testis expressed 11                                                                                                                                                                                                     |
| 241224_x_at  | DSCR8        | 21q22.13       | Down syndrome critical region gene 8                                                                                                                                                                                    |
| 207712_at    | BAGE         | ---            | B melanoma antigen                                                                                                                                                                                                      |
| 209210_s_at  | FERMT2       | 14q22.1        | fermitin family homolog 2 (Drosophila)                                                                                                                                                                                  |
| 228171_s_at  | PLEKHG4      | 16q22.1        | pleckstrin homology domain containing, family G (with RhoGef domain) member 4                                                                                                                                           |
| 208451_s_at  | C4A          | HSCHR6_MHC_QBL | complement component 4A (Rodgers blood group) /// complement component 4B (Chido blood group) /// similar to Complement component 4A (Rodgers blood group) /// similar to complement component 4A (Rodgers blood group) |
| 219702_at    | PLAC1        | Xq26.3         | placenta-specific 1                                                                                                                                                                                                     |
| 224970_at    | NFIA         | 1p31.3         | nuclear factor I/A                                                                                                                                                                                                      |
| 229337_at    | USP2         | 11q23.3        | ubiquitin specific peptidase 2                                                                                                                                                                                          |
| 235902_at    | ---          | ---            | ---                                                                                                                                                                                                                     |
| 1558605_at   | ---          | ---            | ---                                                                                                                                                                                                                     |
| 205529_s_at  | RUNX1T1      | 8q21.3         | run1-related transcription factor 1; translocated to, 1 (cyclin D-related)                                                                                                                                              |
| 209465_x_at  | PTN          | 7q33           | pleiotrophin                                                                                                                                                                                                            |
| 213249_at    | FBXL7        | 5p15.1         | F-box and leucine-rich repeat protein 7                                                                                                                                                                                 |
| 220445_s_at  | CSAG2        | Xq28           | CSAG family, member 2 /// CSAG family, member 3                                                                                                                                                                         |
| 224763_at    | RPL37        | 5p13.1         | Ribosomal protein L37                                                                                                                                                                                                   |
| 233413_at    | ---          | ---            | ---                                                                                                                                                                                                                     |
| 235759_at    | ---          | ---            | ---                                                                                                                                                                                                                     |
| 242135_at    | LOC100289097 | ---            | hypothetical protein LOC100289097 /// similar to FRG1 protein (FSHD region gene 1 protein)                                                                                                                              |
| 243483_at    | TRPM8        | 2q37.1         | transient receptor potential cation channel, subfamily M, member 8                                                                                                                                                      |
| 243943_x_at  | C6orf52      | 6p24.2         | chromosome 6 open reading frame 52                                                                                                                                                                                      |
| 223170_at    | TMEM98       | 17q11.2        | transmembrane protein 98                                                                                                                                                                                                |
| 225599_s_at  | C8orf83      | 8q22.1         | chromosome 8 open reading frame 83                                                                                                                                                                                      |
| 227599_at    | C3orf59      | 3q29           | chromosome 3 open reading frame 59                                                                                                                                                                                      |
| 232195_at    | GPR158       | 10p12.1        | G protein-coupled receptor 158                                                                                                                                                                                          |
| 1553746_a_at | C12orf64     | 12q21.31       | chromosome 12 open reading frame 64                                                                                                                                                                                     |
| 201125_s_at  | ITGB5        | 3q21.2         | integrin, beta 5                                                                                                                                                                                                        |
| 205122_at    | TMEFF1       | 9q31.1         | transmembrane protein with EGF-like and two follistatin-like domains 1                                                                                                                                                  |
| 207076_s_at  | ASS1         | 9q34.11        | argininosuccinate synthetase 1                                                                                                                                                                                          |
| 213032_at    | NFIB         | 9p22.3         | nuclear factor I/B                                                                                                                                                                                                      |
| 218613_at    | PSD3         | 8p22           | pleckstrin and Sec7 domain containing 3                                                                                                                                                                                 |
| 221942_s_at  | GUCY1A3      | 4q32.1         | guanylate cyclase 1, soluble, alpha 3                                                                                                                                                                                   |
| 222116_s_at  | TBC1D16      | 17q25.3        | TBC1 domain family, member 16                                                                                                                                                                                           |
| 226420_at    | MECOM        | 3q26.2         | MDS1 and EVI1 complex locus                                                                                                                                                                                             |
| 242344_at    | GABRB2       | 5q34           | gamma-aminobutyric acid (GABA) A receptor, beta 2                                                                                                                                                                       |
| 203304_at    | BAMBI        | 10p12.1        | BMP and activin membrane-bound inhibitor homolog (Xenopus laevis)                                                                                                                                                       |
| 204653_at    | TFAP2A       | 6p24.3         | transcription factor AP-2 alpha (activating enhancer binding protein 2 alpha)                                                                                                                                           |
| 205542_at    | STEAP1       | 7q21.13        | six transmembrane epithelial antigen of the prostate 1                                                                                                                                                                  |
| 220129_at    | SOHLH2       | 13q13.3        | spermatogenesis and oogenesis specific basic helix-loop-helix 2                                                                                                                                                         |
| 227235_at    | GUCY1A3      | 4q32.1         | guanylate cyclase 1, soluble, alpha 3                                                                                                                                                                                   |
| 238784_at    | DPY19L2      | 7p14.2         | dpy-19-like 2 (C. elegans)                                                                                                                                                                                              |
| 235700_at    | CT45A5       | Xq26.3         | cancer/testis antigen family 45, member A5                                                                                                                                                                              |
| 201681_s_at  | DLG5         | 10q22.3        | discs, large homolog 5 (Drosophila)                                                                                                                                                                                     |
| 207666_x_at  | SSX3         | Xp11.23        | synovial sarcoma, X breakpoint 3                                                                                                                                                                                        |
| 214044_at    | RYR2         | 1q43           | ryanodine receptor 2 (cardiac)                                                                                                                                                                                          |
| 223582_at    | GPR98        | 5q14.3         | G protein-coupled receptor 98                                                                                                                                                                                           |
| 227955_s_at  | EFNA5        | 5q21.3         | ephrin-A5                                                                                                                                                                                                               |
| 228919_at    | ---          | ---            | ---                                                                                                                                                                                                                     |
| 201540_at    | FHL1         | Xq26.3         | four and a half LIM domains 1                                                                                                                                                                                           |
| 201976_s_at  | MYO10        | 5p15.1         | myosin X                                                                                                                                                                                                                |
| 202016_at    | MEST         | 7q32.2         | mesoderm specific transcript homolog (mouse)                                                                                                                                                                            |
| 203355_s_at  | PSD3         | 8p22           | pleckstrin and Sec7 domain containing 3                                                                                                                                                                                 |
| 205347_s_at  | TMSB15A      | Xq22.1         | thymosin beta 15a                                                                                                                                                                                                       |
| 206508_at    | CD70         | 19p13.3        | CD70 molecule                                                                                                                                                                                                           |
| 212190_at    | SERPINE2     | 2q36.1         | serpin peptidase inhibitor, clade E (nexin, plasminogen activator inhibitor type 1), member 2                                                                                                                           |
| 212458_at    | SPRED2       | 2p14           | sprouty-related, EVH1 domain containing 2                                                                                                                                                                               |
| 219855_at    | NUDT11       | Xp11.22        | nudix (nucleoside diphosphate linked moiety X)-type motif 11                                                                                                                                                            |
| 233092_s_at  | LOC100271840 | ---            | hypothetical LOC100271840                                                                                                                                                                                               |
| 237563_s_at  | ---          | ---            | ---                                                                                                                                                                                                                     |
| 204086_at    | PRAME        | 22q11.22       | preferentially expressed antigen in melanoma                                                                                                                                                                            |



|              |          |          |                                                                                                                                                                                                                                                                                                                                                                        |
|--------------|----------|----------|------------------------------------------------------------------------------------------------------------------------------------------------------------------------------------------------------------------------------------------------------------------------------------------------------------------------------------------------------------------------|
| 205348_s_at  | DYNC111  | 7q21.3   | dynein, cytoplasmic 1, intermediate chain 1                                                                                                                                                                                                                                                                                                                            |
| 214603_at    | MAGEA2   | Xq28     | melanoma antigen family A, 2 /// melanoma antigen family A, 2B                                                                                                                                                                                                                                                                                                         |
| 219631_at    | LRP12    | 8q22.3   | low density lipoprotein-related protein 12                                                                                                                                                                                                                                                                                                                             |
| 235947_at    | ---      | ---      | ---                                                                                                                                                                                                                                                                                                                                                                    |
| 238497_at    | TMEM136  | 11q23.3  | transmembrane protein 136                                                                                                                                                                                                                                                                                                                                              |
| 203386_at    | TBC1D4   | 13q22.2  | TBC1 domain family, member 4                                                                                                                                                                                                                                                                                                                                           |
| 204469_at    | PTPRZ1   | 7q31.32  | protein tyrosine phosphatase, receptor-type, Z polypeptide 1                                                                                                                                                                                                                                                                                                           |
| 210999_s_at  | GRB10    | 7p12.1   | growth factor receptor-bound protein 10<br>cancer/testis antigen family 45, member A1 /// cancer/testis antigen family 45, member A2 /// cancer/testis antigen family 45, member A3 /// cancer/testis antigen family 45, member A4 /// cancer/testis antigen family 45, member A5 /// cancer/testis antigen family 45, member A6 /// hypothetical protein LOC100133581 |
| 1567912_s_at | CT45A1   | Xq26.3   | latrophilin 2<br>sulfatase 1                                                                                                                                                                                                                                                                                                                                           |
| 206953_s_at  | LPHN2    | 1p31.1   | chromosome 1 open reading frame 106                                                                                                                                                                                                                                                                                                                                    |
| 212354_at    | SULF1    | 8q13.2   | transmembrane protease, serine 3                                                                                                                                                                                                                                                                                                                                       |
| 219010_at    | C1orf106 | 1q32.1   | hairy and enhancer of split 6 ( <i>Drosophila</i> )                                                                                                                                                                                                                                                                                                                    |
| 223948_s_at  | TMPRSS3  | 21q22.3  | SIX homeobox 1                                                                                                                                                                                                                                                                                                                                                         |
| 226446_at    | HES6     | 2q37.3   | ---                                                                                                                                                                                                                                                                                                                                                                    |
| 228347_at    | SIX1     | 14q23.1  | CDP-diacylglycerol synthase (phosphatidate cytidylyltransferase) 1                                                                                                                                                                                                                                                                                                     |
| 1564220_a_at | ---      | ---      | transmembrane protein 47                                                                                                                                                                                                                                                                                                                                               |
| 205709_s_at  | CDS1     | 4q21.23  | hypothetical protein MGC12916                                                                                                                                                                                                                                                                                                                                          |
| 209655_s_at  | TMEM47   | Xp21.1   | signal-induced proliferation-associated 1 like 2                                                                                                                                                                                                                                                                                                                       |
| 224507_s_at  | MGC12916 | ---      | receptor accessory protein 1                                                                                                                                                                                                                                                                                                                                           |
| 225056_at    | SIPA1L2  | 1q42.2   | synovial sarcoma, X breakpoint 1                                                                                                                                                                                                                                                                                                                                       |
| 204365_s_at  | REEP1    | 2p11.2   | hemoglobin, delta                                                                                                                                                                                                                                                                                                                                                      |
| 206626_x_at  | SSX1     | Xp11.23  | transmembrane protein 47                                                                                                                                                                                                                                                                                                                                               |
| 206834_at    | HBD      | 11p15.4  | armadillo repeat containing 4                                                                                                                                                                                                                                                                                                                                          |
| 209656_s_at  | TMEM47   | Xp21.1   | sodium channel, voltage-gated, type II, alpha subunit                                                                                                                                                                                                                                                                                                                  |
| 223794_at    | ARMC4    | 10p12.1  | mutated in colorectal cancers                                                                                                                                                                                                                                                                                                                                          |
| 229057_at    | SCN2A    | 2q24.3   | EP300 interacting inhibitor of differentiation 1                                                                                                                                                                                                                                                                                                                       |
| 226225_at    | MCC      | 5q22.2   | cytochrome P450, family 2, subfamily R, polypeptide 1                                                                                                                                                                                                                                                                                                                  |
| 208670_s_at  | EID1     | ---      | Fc receptor-like B                                                                                                                                                                                                                                                                                                                                                     |
| 227109_at    | CYP2R1   | 11p15.2  | chondroitin sulfate synthase 3                                                                                                                                                                                                                                                                                                                                         |
| 238452_at    | FCRLB    | 1q23.3   | RNA binding motif protein 9                                                                                                                                                                                                                                                                                                                                            |
| 242100_at    | CHSY3    | 5q23.3   | peptidylglycine alpha-amidating monooxygenase                                                                                                                                                                                                                                                                                                                          |
| 216215_s_at  | RBM9     | ---      | Fatty acyl CoA reductase 2                                                                                                                                                                                                                                                                                                                                             |
| 212958_x_at  | PAM      | 5q21.1   | dickkopf homolog 1 ( <i>Xenopus laevis</i> )                                                                                                                                                                                                                                                                                                                           |
| 239108_at    | FAR2     | 12p11.22 | estrogen-related receptor gamma                                                                                                                                                                                                                                                                                                                                        |
| 204602_at    | DKK1     | 10q21.1  | biotinidase                                                                                                                                                                                                                                                                                                                                                            |
| 207981_s_at  | ESRRG    | 1q41     | coiled-coil domain containing 6                                                                                                                                                                                                                                                                                                                                        |
| 204167_at    | BTD      | 3p25.1   | IMP2 inner mitochondrial membrane peptidase-like ( <i>S. cerevisiae</i> )                                                                                                                                                                                                                                                                                              |
| 225010_at    | CCDC6    | 10q21.2  | v-kit Hardy-Zuckerman 4 feline sarcoma viral oncogene homolog                                                                                                                                                                                                                                                                                                          |
| 227153_at    | IMMP2L   | 7q31.1   | ---                                                                                                                                                                                                                                                                                                                                                                    |
| 205051_s_at  | KIT      | 4q12     | canopy 3 homolog (zebrafish)                                                                                                                                                                                                                                                                                                                                           |
| 1554609_at   | ---      | ---      | runt-related transcription factor 1                                                                                                                                                                                                                                                                                                                                    |
| 1556389_at   | CNPY3    | 6p21.1   | small VCP/p97-interacting protein                                                                                                                                                                                                                                                                                                                                      |
| 209360_s_at  | RUNX1    | 21q22.12 | MORC family CW-type zinc finger 1                                                                                                                                                                                                                                                                                                                                      |
| 230285_at    | SVIP     | 11p14.3  | activin A receptor, type IC                                                                                                                                                                                                                                                                                                                                            |
| 220850_at    | MORC1    | 3q13.13  | syndecan 1                                                                                                                                                                                                                                                                                                                                                             |
| 1552519_at   | ACVR1C   | 2q24.1   | blocked early in transport 1 homolog ( <i>S. cerevisiae</i> )-like                                                                                                                                                                                                                                                                                                     |
| 201287_s_at  | SDC1     | 2p24.1   | ribosomal protein L35a                                                                                                                                                                                                                                                                                                                                                 |
| 220470_at    | BET1L    | 11p15.5  | growth arrest and DNA-damage-inducible, alpha                                                                                                                                                                                                                                                                                                                          |
| 238026_at    | RPL35A   | 3q29     | transmembrane protein 45A                                                                                                                                                                                                                                                                                                                                              |
| 203725_at    | GADD45A  | 1p31.3   | vav 3 guanine nucleotide exchange factor                                                                                                                                                                                                                                                                                                                               |
| 219410_at    | TMEM45A  | 3q12.2   | eukaryotic translation initiation factor 4E family member 3                                                                                                                                                                                                                                                                                                            |
| 218806_s_at  | VAV3     | 1p13.3   | protein tyrosine phosphatase, receptor type, K                                                                                                                                                                                                                                                                                                                         |
| 238461_at    | EIF4E3   | 3p13     | hepatocyte growth factor (hepapoietin A; scatter factor)                                                                                                                                                                                                                                                                                                               |
| 203038_at    | PTPRK    | 6q22.33  | biotinidase                                                                                                                                                                                                                                                                                                                                                            |
| 209961_s_at  | HGF      | 7q21.11  | bone morphogenetic protein 6                                                                                                                                                                                                                                                                                                                                           |
| 214117_s_at  | BTD      | 3p25.1   | ---                                                                                                                                                                                                                                                                                                                                                                    |
| 206176_at    | BMP6     | 6p24.3   | hepatocyte growth factor (hepapoietin A; scatter factor)                                                                                                                                                                                                                                                                                                               |
| 230175_s_at  | ---      | ---      | Ras association (RalGDS/AF-6) domain family (N-terminal) member 8                                                                                                                                                                                                                                                                                                      |
| 210997_at    | HGF      | 7q21.11  | FK506 binding protein 5                                                                                                                                                                                                                                                                                                                                                |
| 225946_at    | RASSF8   | 12p12.1  | hepatocyte growth factor (hepapoietin A; scatter factor)                                                                                                                                                                                                                                                                                                               |
| 224856_at    | FKBP5    | 6p21.31  | Ca <sup>++</sup> -dependent secretion activator 2                                                                                                                                                                                                                                                                                                                      |
| 210998_s_at  | HGF      | 7q21.11  | FK506 binding protein 5                                                                                                                                                                                                                                                                                                                                                |
| 219572_at    | CADPS2   | 7q31.32  | leucine rich repeat neuronal 1                                                                                                                                                                                                                                                                                                                                         |
| 224840_at    | FKBP5    | 6p21.31  | estrogen-related receptor gamma                                                                                                                                                                                                                                                                                                                                        |
| 226884_at    | LRRN1    | 3p26.2   | fatty acyl CoA reductase 2                                                                                                                                                                                                                                                                                                                                             |
| 209966_x_at  | ESRRG    | 1q41     | proline rich 15                                                                                                                                                                                                                                                                                                                                                        |
| 220615_s_at  | FAR2     | 12p11.22 | G protein-coupled receptor 108                                                                                                                                                                                                                                                                                                                                         |
| 226961_at    | PRR15    | 7p14.3   | Protein tyrosine phosphatase, receptor type, K                                                                                                                                                                                                                                                                                                                         |
| 225058_at    | GPR108   | 19p13.3  | peptidylglycine alpha-amidating monooxygenase                                                                                                                                                                                                                                                                                                                          |
| 233609_at    | PTPRK    | 6q22.33  | paraoxonase 2                                                                                                                                                                                                                                                                                                                                                          |
| 202336_s_at  | PAM      | 5q21.1   | hairy/enhancer-of-split related with YRPW motif 2                                                                                                                                                                                                                                                                                                                      |
| 210830_s_at  | PON2     | 7q21.3   |                                                                                                                                                                                                                                                                                                                                                                        |
| 219743_at    | HEY2     | 6q22.31  |                                                                                                                                                                                                                                                                                                                                                                        |

|              |          |          |                                                                                                   |
|--------------|----------|----------|---------------------------------------------------------------------------------------------------|
| 222921_s_at  | HEY2     | 6q22.31  | hairy/enhancer-of-split related with YRPW motif 2                                                 |
| 215059_at    | ---      | ---      | ---                                                                                               |
| 219628_at    | ZMAT3    | 3q26.32  | zinc finger, matrin type 3                                                                        |
| 217053_x_at  | ETV1     | 7p21.2   | ets variant 1                                                                                     |
| 231130_at    | FKBP7    | 2q31.2   | FK506 binding protein 7                                                                           |
| 226692_at    | SERF2    | 15q15.3  | small EDRK-rich factor 2                                                                          |
| 230428_at    | ---      | ---      | ---                                                                                               |
| 209960_at    | HGF      | 7q21.11  | hepatocyte growth factor (hepapoietin A; scatter factor)                                          |
| 214879_x_at  | USF2     | 19q13.12 | upstream transcription factor 2, c-fos interacting                                                |
| 210812_at    | XRCC4    | 5q14.2   | X-ray repair complementing defective repair in Chinese hamster cells 4                            |
| 213324_at    | SRC      | 20q11.23 | v-src sarcoma (Schmidt-Ruppin A-2) viral oncogene homolog (avian)                                 |
| 220595_at    | PDZRN4   | 12q12    | PDZ domain containing ring finger 4                                                               |
| 209583_s_at  | CD200    | 3q13.2   | CD200 molecule                                                                                    |
| 204917_s_at  | MLLT3    | 9p21.3   | myeloid/lymphoid or mixed-lineage leukemia (trithorax homolog, Drosophila);<br>translocated to, 3 |
| 222451_s_at  | ZDHHC9   | Xq26.1   | zinc finger, DHHC-type containing 9                                                               |
| 207399_at    | BFSF2    | 3q22.1   | beaded filament structural protein 2, phakinin                                                    |
| 220120_s_at  | EPB41L4A | 5q22.2   | erythrocyte membrane protein band 4.1 like 4A                                                     |
| 221933_at    | NLGN4X   | Xp22.31  | neuroligin 4, X-linked                                                                            |
| 203349_s_at  | ETV5     | 3q27.2   | ets variant 5                                                                                     |
| 203769_s_at  | STS      | Xp22.31  | steroid sulfatase (microsomal), isozyme S                                                         |
| 225540_at    | MAP2     | 2q34     | microtubule-associated protein 2                                                                  |
| 221297_at    | GPRC5D   | 12p13.1  | G protein-coupled receptor, family C, group 5, member D                                           |
| 228218_at    | ---      | ---      | ---                                                                                               |
| 229084_at    | CNTN4    | 3p26.3   | contactin 4                                                                                       |
| 205073_at    | CYP2J2   | 1p32.1   | cytochrome P450, family 2, subfamily J, polypeptide 2                                             |
| 202728_s_at  | LTBP1    | 2p22.3   | latent transforming growth factor beta binding protein 1                                          |
| 205578_at    | ROR2     | 9q22.31  | receptor tyrosine kinase-like orphan receptor 2                                                   |
| 230560_at    | STXBP6   | 14q12    | syntaxin binding protein 6 (amisyn)                                                               |
| 227492_at    | ---      | ---      | ---                                                                                               |
| 210130_s_at  | TM7SF2   | 11q13.1  | transmembrane 7 superfamily member 2                                                              |
| 222520_s_at  | IFT57    | 3q13.13  | intraflagellar transport 57 homolog (Chlamydomonas)                                               |
| 222785_x_at  | C11orf1  | 11q23.1  | chromosome 11 open reading frame 1                                                                |
| 1560316_s_at | GLCCI1   | 7p21.3   | glucocorticoid induced transcript 1                                                               |
| 229244_at    | ---      | ---      | ---                                                                                               |
| 208190_s_at  | LSR      | 19q13.12 | lipolysis stimulated lipoprotein receptor                                                         |
| 228150_at    | SEC16B   | 1q25.2   | SEC16 homolog B ( <i>S. cerevisiae</i> )                                                          |
| 238646_at    | ---      | ---      | ---                                                                                               |
| 239468_at    | MKX      | 10p12.1  | mohawk homeobox                                                                                   |
| 227209_at    | CNTN1    | 12q12    | Contactin 1                                                                                       |
| 1569652_at   | MLLT3    | 9p21.3   | myeloid/lymphoid or mixed-lineage leukemia (trithorax homolog, Drosophila);<br>translocated to, 3 |
| 236646_at    | C12orf59 | 12p13.2  | chromosome 12 open reading frame 59                                                               |
| 214395_x_at  | EEF1D    | 8q24.3   | eukaryotic translation elongation factor 1 delta (guanine nucleotide exchange<br>protein)         |
| 218807_at    | VAV3     | 1p13.3   | vav 3 guanine nucleotide exchange factor                                                          |
| 244787_at    | ---      | ---      | ---                                                                                               |
| 201876_at    | PON2     | 7q21.3   | paraoxonase 2                                                                                     |
| 215195_at    | PRKCA    | 17q24.2  | protein kinase C, alpha                                                                           |
| 227342_s_at  | MYEOV    | 11q13.3  | myeloma overexpressed (in a subset of t(11;14) positive multiple myelomas)                        |
| 229319_at    | ---      | ---      | ---                                                                                               |
| 1553871_at   | C19orf34 | 19p13.3  | chromosome 19 open reading frame 34                                                               |
| 200666_s_at  | DNAJB1   | 19p13.12 | DnaJ (Hsp40) homolog, subfamily B, member 1                                                       |
| 205990_s_at  | WNT5A    | 3p14.3   | wingless-type MMTV integration site family, member 5A                                             |
| 226618_at    | FLJ25076 | ---      | probable ubiquitin-conjugating enzyme E2 FLJ25076                                                 |
| 218772_x_at  | TMEM38B  | 9q31.2   | transmembrane protein 38B                                                                         |
| 231530_s_at  | C11orf1  | 11q23.1  | chromosome 11 open reading frame 1                                                                |
| 235494_at    | ---      | ---      | ---                                                                                               |
| 222433_at    | ENAH     | 1q42.12  | enabled homolog (Drosophila)                                                                      |
| 221207_s_at  | NBEA     | 13q13.3  | neurobeachin                                                                                      |
| 210946_at    | PPAP2A   | 5q11.2   | phosphatidic acid phosphatase type 2A                                                             |
| 1563182_at   | ACVR1C   | 2q24.1   | activin A receptor, type IC                                                                       |
| 200730_s_at  | PTP4A1   | 6q12     | protein tyrosine phosphatase type IVA, member 1                                                   |
| 225496_s_at  | SYTL2    | 11q14.1  | synaptotagmin-like 2                                                                              |
| 228956_at    | UGT8     | 4q26     | UDP glycosyltransferase 8                                                                         |
| 223136_at    | AIG1     | 6q24.2   | androgen-induced 1                                                                                |
| 202011_at    | TJP1     | 15q13.1  | tight junction protein 1 (zona occludens 1)                                                       |
| 210336_x_at  | MZF1     | 19q13.43 | myeloid zinc finger 1                                                                             |
| 213938_at    | ERC2     | 3p14.3   | ELKS/RAB6-interacting/CAST family member 2                                                        |
| 231431_s_at  | ---      | ---      | ---                                                                                               |
| 200973_s_at  | TSPAN3   | 15q24.3  | tetraspanin 3                                                                                     |
| 1561657_at   | ---      | ---      | ---                                                                                               |
| 1552716_at   | SPEF2    | 5p13.2   | sperm flagellar 2                                                                                 |
| 229233_at    | NRG3     | 10q23.1  | neuregulin 3                                                                                      |
| 200811_at    | CIRBP    | 19p13.3  | cold inducible RNA binding protein                                                                |
| 204118_at    | CD48     | 1q23.3   | CD48 molecule                                                                                     |
| 203998_s_at  | SYT1     | 12q21.2  | synaptotagmin I                                                                                   |

|              |              |          |                                                                                                  |
|--------------|--------------|----------|--------------------------------------------------------------------------------------------------|
| 212095_s_at  | MTUS1        | 8p22     | mitochondrial tumor suppressor 1                                                                 |
| 203895_at    | PLCB4        | 20p12.3  | phospholipase C, beta 4                                                                          |
| 206701_x_at  | EDNRB        | 13q22.3  | endothelin receptor type B                                                                       |
| 1554833_at   | MCTP2        | 15q26.2  | multiple C2 domains, transmembrane 2                                                             |
| 223854_at    | PCDHB10      | 5q31.3   | protocadherin beta 10                                                                            |
| 226586_at    | ANKS6        | 9q22.33  | ankyrin repeat and sterile alpha motif domain containing 6                                       |
| 212843_at    | NCAM1        | 11q23.2  | neural cell adhesion molecule 1                                                                  |
| 226439_s_at  | NBEA         | 13q13.3  | neurobeachin                                                                                     |
| 243109_at    | MCTP2        | 15q26.2  | multiple C2 domains, transmembrane 2                                                             |
| 231997_at    | TBCEL        | 11q23.3  | tubulin folding cofactor E-like                                                                  |
| 204918_s_at  | MLLT3        | 9p21.3   | myeloid/lymphoid or mixed-lineage leukemia (trithorax homolog, Drosophila); translocated to, 3   |
| 213425_at    | WNT5A        | 3p14.3   | wingless-type MMTV integration site family, member 5A                                            |
| 202729_s_at  | LTBP1        | 2p22.3   | latent transforming growth factor beta binding protein 1                                         |
| 226462_at    | STXBP6       | 14q12    | syntaxin binding protein 6 (amisyn)                                                              |
| 205442_at    | MFAP3L       | 4q33     | microfibrillar-associated protein 3-like                                                         |
| 214734_at    | EXPH5        | 11q22.3  | exophilin 5                                                                                      |
| 225133_at    | KLF3         | 4p14     | Kruppel-like factor 3 (basic)                                                                    |
| 207996_s_at  | C18orf1      | 18p11.21 | chromosome 18 open reading frame 1                                                               |
| 239252_at    | ---          | ---      | ---                                                                                              |
| 203987_at    | FZD6         | 8q22.3   | frizzled homolog 6 (Drosophila)                                                                  |
| 213415_at    | CLIC2        | Xq28     | chloride intracellular channel 2                                                                 |
| 227394_at    | NCAM1        | 11q23.2  | neural cell adhesion molecule 1                                                                  |
| 233582_at    | LOC115110    | ---      | hypothetical protein LOC115110                                                                   |
| 210755_at    | HGF          | 7q21.11  | hepatocyte growth factor (hepapoietin A; scatter factor)                                         |
| 227306_at    | ---          | ---      | ---                                                                                              |
| 232745_x_at  | SPEF2        | 5p13.2   | sperm flagellar 2                                                                                |
| 204014_at    | DUSP4        | 8p12     | dual specificity phosphatase 4                                                                   |
| 208711_s_at  | CCND1        | 11q13.3  | cyclin D1                                                                                        |
| 212724_at    | RND3         | 2q23.3   | Rho family GTPase 3                                                                              |
| 217998_at    | LOC100289208 | ---      | hypothetical protein LOC100289208 /// pleckstrin homology-like domain, family A, member 1        |
| 234996_at    | CALCRL       | 2q32.1   | calcitonin receptor-like                                                                         |
| 231227_at    | ---          | ---      | ---                                                                                              |
| 242523_at    | ---          | ---      | ---                                                                                              |
| 203243_s_at  | PDLIM5       | 4q22.3   | PDZ and LIM domain 5                                                                             |
| 220994_s_at  | STXBP6       | 14q12    | syntaxin binding protein 6 (amisyn)                                                              |
| 203698_s_at  | FRZB         | 2q32.1   | frizzled-related protein                                                                         |
| 1557673_at   | ---          | ---      | ---                                                                                              |
| 1554997_a_at | PTGS2        | 1q31.1   | prostaglandin-endoperoxide synthase 2 (prostaglandin G/H synthase and cyclooxygenase)            |
| 205373_at    | CTNNA2       | 2p12     | catenin (cadherin-associated protein), alpha 2                                                   |
| 212099_at    | RHOB         | 2p24.1   | ras homolog gene family, member B                                                                |
| 243433_at    | ---          | ---      | ---                                                                                              |
| 213110_s_at  | COL4A5       | Xq22.3   | collagen, type IV, alpha 5                                                                       |
| 209708_at    | MOXD1        | 6q23.2   | monooxygenase, DBH-like 1                                                                        |
| 235047_x_at  | NACC1        | 19p13.2  | nucleus accumbens associated 1, BEN and BTB (POZ) domain containing                              |
| 223704_s_at  | DMRT2        | 9p24.3   | doublesex and mab-3 related transcription factor 2                                               |
| 231726_at    | PCDHB14      | 5q31.3   | protocadherin beta 14                                                                            |
| 201843_s_at  | EFEMP1       | 2p16.1   | EGF-containing fibulin-like extracellular matrix protein 1                                       |
| 213901_x_at  | RBM9         | ---      | RNA binding motif protein 9                                                                      |
| 1553253_at   | ASB16        | 17q21.31 | ankyrin repeat and SOCS box-containing 16                                                        |
| 209101_at    | CTGF         | 6q23.2   | connective tissue growth factor                                                                  |
| 222365_at    | ---          | ---      | ---                                                                                              |
| 233265_at    | ---          | ---      | ---                                                                                              |
| 238605_at    | NOL4         | 18q12.1  | nucleolar protein 4                                                                              |
| 1558796_a_at | LOC728052    | ---      | Similar to hCG2031213                                                                            |
| 218885_s_at  | GALNT12      | 9q22.33  | UDP-N-acetyl-alpha-D-galactosamine:polypeptide N-acetylgalactosaminyltransferase 12 (GalNAc-T12) |
| 235201_at    | ---          | ---      | ---                                                                                              |
| 243184_at    | ---          | ---      | ---                                                                                              |
| 204271_s_at  | EDNRB        | 13q22.3  | endothelin receptor type B                                                                       |
| 206045_s_at  | NOL4         | 18q12.1  | nucleolar protein 4                                                                              |
| 202973_x_at  | FAM13A       | 4q22.1   | family with sequence similarity 13, member A                                                     |
| 215428_at    | ---          | ---      | ---                                                                                              |
| 227202_at    | CNTN1        | 12q12    | Contactin 1                                                                                      |
| 212104_s_at  | RBM9         | ---      | RNA binding motif protein 9                                                                      |
| 210942_s_at  | ST3GAL6      | 3q12.1   | ST3 beta-galactoside alpha-2,3-sialyltransferase 6                                               |
| 235205_at    | LOC346887    | ---      | similar to solute carrier family 16 (monocarboxylic acid transporters), member 14                |
| 213355_at    | ST3GAL6      | 3q12.1   | ST3 beta-galactoside alpha-2,3-sialyltransferase 6                                               |
| 219747_at    | C4orf31      | 4q27     | chromosome 4 open reading frame 31                                                               |
| 241560_at    | ---          | ---      | ---                                                                                              |
| 227180_at    | ELOVL7       | 5q12.1   | ELOVL family member 7, elongation of long chain fatty acids (yeast)                              |
| 227722_at    | RPS23        | 5q14.2   | ribosomal protein S23                                                                            |
| 230319_at    | ---          | ---      | ---                                                                                              |
| 204321_at    | NEO1         | 15q24.1  | neogenin homolog 1 (chicken)                                                                     |

|              |           |                |                                                                                   |
|--------------|-----------|----------------|-----------------------------------------------------------------------------------|
| 223470_at    | PIGM      | 1q23.2         | phosphatidylinositol glycan anchor biosynthesis, class M                          |
| 207623_at    | ABCF2     | 7q36.1         | ATP-binding cassette, sub-family F (GCN20), member 2                              |
| 226656_at    | CRTAP     | 3p22.3         | cartilage associated protein                                                      |
| 235168_at    | PIGM      | 1q23.2         | phosphatidylinositol glycan anchor biosynthesis, class M                          |
| 231851_at    | RAVER2    | 1p31.3         | ribonucleoprotein, PTB-binding 2                                                  |
| 204824_at    | ENDOG     | 9q34.11        | endonuclease G                                                                    |
| 203215_s_at  | MYO6      | 6q14.1         | myosin VI                                                                         |
| 210157_at    | C19orf2   | 19q12          | chromosome 19 open reading frame 2                                                |
| 201061_s_at  | STOM      | 9q33.2         | stomatin                                                                          |
| 207266_x_at  | RBMS1     | 2q24.2         | RNA binding motif, single stranded interacting protein 1                          |
| 221524_s_at  | RRAGD     | 6q15           | Ras-related GTP binding D                                                         |
| 217820_s_at  | ENAH      | 1q42.12        | enabled homolog (Drosophila)                                                      |
| 223042_s_at  | FUNDC2    | Xq28           | FUN14 domain containing 2                                                         |
| 227503_at    | ---       | ---            | ---                                                                               |
| 225269_s_at  | RBMS1     | 2q24.2         | RNA binding motif, single stranded interacting protein 1                          |
| 227126_at    | ---       | ---            | ---                                                                               |
| 227903_x_at  | C19orf20  | 19p13.3        | chromosome 19 open reading frame 20                                               |
| 225823_at    | C19orf70  | 19p13.3        | chromosome 19 open reading frame 70                                               |
| 209147_s_at  | PPAP2A    | 5q11.2         | phosphatidic acid phosphatase type 2A                                             |
| 202912_at    | ADM       | 11p15.4        | adrenomedullin                                                                    |
| 224802_at    | NDFIP2    | 13q31.1        | Nedd4 family interacting protein 2                                                |
| 208745_at    | ATP5L     | 11q23.3        | ATP synthase, H+ transporting, mitochondrial F0 complex, subunit G                |
| 205208_at    | ALDH1L1   | 3q21.3         | aldehyde dehydrogenase 1 family, member L1                                        |
| 225745_at    | LRP6      | 12p13.2        | low density lipoprotein receptor-related protein 6                                |
| 212463_at    | CD59      | 11p13          | CD59 molecule, complement regulatory protein                                      |
| 236009_at    | PERP      | 6q23.3         | PERP, TP53 apoptosis effector                                                     |
| 223823_at    | KCNMB2    | 3q26.32        | potassium large conductance calcium-activated channel, subfamily M, beta member 2 |
| 202946_s_at  | BTBD3     | 20p12.2        | BTB (POZ) domain containing 3                                                     |
| 231131_at    | FAM133A   | Xq21.32        | family with sequence similarity 133, member A                                     |
| 1557167_at   | HCG11     | 6p22.2         | HLA complex group 11                                                              |
| 225265_at    | RBMS1     | 2q24.2         | RNA binding motif, single stranded interacting protein 1                          |
| 203748_x_at  | RBMS1     | 2q24.2         | RNA binding motif, single stranded interacting protein 1                          |
| 229313_at    | ANOS      | 11p14.3        | anoctamin 5                                                                       |
| 209368_at    | EPHX2     | 8p21.2         | epoxide hydrolase 2, cytoplasmic                                                  |
| 218868_at    | ACTR3B    | 7q36.1         | ARP3 actin-related protein 3 homolog B (yeast)                                    |
| 221523_s_at  | RRAGD     | 6q15           | Ras-related GTP binding D                                                         |
| 1560115_a_at | KIAA1217  | 10p12.2        | KIAA1217                                                                          |
| 222735_at    | TMEM38B   | 9q31.2         | transmembrane protein 38B                                                         |
| 236622_at    | PIGM      | 1q23.2         | phosphatidylinositol glycan anchor biosynthesis, class M                          |
| 201482_at    | QSOX1     | 1q25.2         | quiescinq Q6 sulfhydryl oxidase 1                                                 |
| 219532_at    | ELOVL4    | 6q14.1         | elongation of very long chain fatty acids (FEN1/Elo2, SUR4/Elo3, yeast)-like 4    |
| 202242_at    | TSPAN7    | Xp11.4         | tetraspanin 7                                                                     |
| 236752_at    | ---       | ---            | ---                                                                               |
| 202648_at    | ---       | ---            | ---                                                                               |
| 225698_at    | C5orf26   | ---            | chromosome 5 open reading frame 26                                                |
| 227370_at    | FAM171B   | 2q32.1         | family with sequence similarity 171, member B                                     |
| 228375_at    | IGSF11    | 3q13.32        | immunoglobulin superfamily, member 11                                             |
| 204944_at    | PTPRG     | 3p14.2         | protein tyrosine phosphatase, receptor type, G                                    |
| 202893_at    | UNC13B    | 9p13.3         | unc-13 homolog B (C. elegans)                                                     |
| 236104_at    | HNRPLL    | 2p22.1         | heterogeneous nuclear ribonucleoprotein L-like                                    |
| 220253_s_at  | LRP12     | 8q22.3         | low density lipoprotein-related protein 12                                        |
| 208712_at    | CCND1     | 11q13.3        | cyclin D1                                                                         |
| 225112_at    | ABI2      | 2q33.2         | abl-interactor 2                                                                  |
| 220062_s_at  | MAGEC2    | Xq27.2         | melanoma antigen family C, 2                                                      |
| 235228_at    | CCDC85A   | 2p16.1         | coiled-coil domain containing 85A                                                 |
| 223125_s_at  | C1orf21   | 1q25.3         | chromosome 1 open reading frame 21                                                |
| 206609_at    | MAGEC1    | Xq27.2         | melanoma antigen family C, 1                                                      |
| 225004_at    | TMEM101   | 17q21.31       | transmembrane protein 101                                                         |
| 244532_x_at  | ---       | ---            | ---                                                                               |
| 209737_at    | MAGI2     | 7q21.11        | membrane associated guanylate kinase, WW and PDZ domain containing 2              |
| 210145_at    | PLA2G4A   | 1q31.1         | phospholipase A2, group IVA (cytosolic, calcium-dependent)                        |
| 225922_at    | FNIP2     | 4q32.1         | folliculin interacting protein 2                                                  |
| 209631_s_at  | GPR37     | 7q31.33        | G protein-coupled receptor 37 (endothelin receptor type B-like)                   |
| 223614_at    | MMP16     | 8q21.3         | matrix metalloproteinase 16 (membrane-inserted)                                   |
| 235014_at    | LOC147727 | ---            | hypothetical LOC147727                                                            |
| 231856_at    | KIAA1244  | 6q23.3         | KIAA1244                                                                          |
| 1568597_at   | LOC646762 | ---            | hypothetical LOC646762                                                            |
| 214829_at    | AASS      | 7q31.32        | aminoadipate-semialdehyde synthase                                                |
| 1554438_at   | KIAA1217  | 10p12.2        | KIAA1217                                                                          |
| 211098_x_at  | TMCO1     | 1q24.1         | transmembrane and coiled-coil domains 1                                           |
| 1557169_x_at | HCG11     | 6p22.2         | HLA complex group 11                                                              |
| 222896_at    | TMEM38A   | 19p13.11       | transmembrane protein 38A                                                         |
| 210655_s_at  | FOXO3     | 6q21           | forkhead box O3 /// forkhead box O3B pseudogene                                   |
| 1557765_at   | LOC643401 | ---            | hypothetical protein LOC643401                                                    |
| 220755_s_at  | C6orf48   | HSCHR6_MHC_QBL | chromosome 6 open reading frame 48                                                |
| 229435_at    | GLIS3     | 9p24.2         | GLIS family zinc finger 3                                                         |

|             |          |         |                                                                                                                                                                                                                                                                                                                 |
|-------------|----------|---------|-----------------------------------------------------------------------------------------------------------------------------------------------------------------------------------------------------------------------------------------------------------------------------------------------------------------|
| 214001_x_at | ---      | ---     | ---                                                                                                                                                                                                                                                                                                             |
| 204485_s_at | TOM1L1   | 17q22   | target of myb1 (chicken)-like 1                                                                                                                                                                                                                                                                                 |
| 231807_at   | KIAA1217 | 10p12.2 | KIAA1217                                                                                                                                                                                                                                                                                                        |
| 243278_at   | ---      | ---     | ---                                                                                                                                                                                                                                                                                                             |
| 205110_s_at | FGF13    | Xq27.1  | fibroblast growth factor 13                                                                                                                                                                                                                                                                                     |
| 205968_at   | KCNS3    | 2p24.2  | potassium voltage-gated channel, delayed-rectifier, subfamily S, member 3                                                                                                                                                                                                                                       |
| 225600_at   | C8orf83  | 8q22.1  | chromosome 8 open reading frame 83                                                                                                                                                                                                                                                                              |
| 244359_s_at | ---      | ---     | ---                                                                                                                                                                                                                                                                                                             |
| 243918_at   | ---      | ---     | ---                                                                                                                                                                                                                                                                                                             |
| 207086_x_at | GAGE1    | Xp11.23 | G antigen 1 /// G antigen 12C /// G antigen 12D /// G antigen 12E /// G antigen 12F /// G antigen 12G /// G antigen 12H /// G antigen 12I /// G antigen 12J /// G antigen 2A /// G antigen 2C /// G antigen 2D /// G antigen 2E /// G antigen 4 /// G antigen 5 /// G antigen 6 /// G antigen 7 /// G antigen 8 |
| 219195_at   | PPARGC1A | 4p15.2  | peroxisome proliferator-activated receptor gamma, coactivator 1 alpha                                                                                                                                                                                                                                           |
| 235764_at   | ---      | ---     | ---                                                                                                                                                                                                                                                                                                             |
