# Supplementary material for: Identification of Pluripotent and Adult Stem Cell Genes Unrelated to Cell Cycle and Associated with Poor Prognosis in Multiple Myeloma
Source: PubMed Central journal article supplement (PMC3409163; doi:10.1371/journal.pone.0042161), 2012-07-31
Supplement: pone.0042161.s007.pdf [file pone.0042161.s007.pdf]

|                                 | <b>SC score groups</b>                   |                                        |
|---------------------------------|------------------------------------------|----------------------------------------|
|                                 | <sup>SC</sup> Score ≤ -2.70<br>(n = 185) | <sup>SC</sup> Score > -2.7<br>(n = 21) |
| Categories                      | % of patients in each group              |                                        |
| Age ≥ 65 yr                     | 18%                                      | 29%                                    |
| IgA subtype                     | 22%                                      | 29%                                    |
| Kappa light chain               | 63%                                      | 75%                                    |
| Lambda light chain              | 35%                                      | 25%                                    |
| Non-secreting                   | 2%                                       | 0%                                     |
| β2M ≤ 3.5 mg/ml                 | 65%                                      | 52%                                    |
| β2M > 5.5 mg/ml                 | 14%                                      | 29%                                    |
| LDH ≥ 240 IU/liter              | 23%                                      | 25%                                    |
| <b>Albumin &lt; 35 g/liter</b>  | <b>30%</b>                               | <b>55%</b>                             |
| <b>Hemoglobin &lt; 10 g/dl</b>  | <b>25%</b>                               | <b>57%</b>                             |
| C-reactive protein ≥ 5 mg/liter | 36%                                      | 38%                                    |
| Bone lesions                    |                                          |                                        |
| 0: normal bone structure        | 21%                                      | 30%                                    |
| 1: osteopenie / osteoporosis    | 29%                                      | 45%                                    |
| 2: osteolyse [1-3]              | 7%                                       | 10%                                    |
| 3: major structural damage [>3] | 43%                                      | 15%                                    |

| Staging          | <sup>SC</sup> Score ≤ -2.7 (n = 159) |     |     | <sup>SC</sup> Score > -2.7 (n = 21) |     |     |
|------------------|--------------------------------------|-----|-----|-------------------------------------|-----|-----|
|                  | I                                    | II  | III | I                                   | II  | III |
| Salmon and durie | 11%                                  | 15% | 74% | 10%                                 | 14% | 76% |
| ISS              | 50%                                  | 35% | 15% | 29%                                 | 43% | 28% |

Table S5. Clinical characteristics of patients in the 2 groups defined by <sup>SC</sup>score

The 206 previously-untreated patients of the HM cohort were treated at the university hospitals of Heidelberg and Montpellier. Patients were separated in 2 groups: low-risk (<sup>SC</sup>score ≤ -2.7) and high-risk (<sup>SC</sup>score > -2.7) <sup>SC</sup>score groups. Data are the percentages of patients within these 2 groups with the indicated clinical or biological parameters. When the percentages were different with a chisquare test ( $P \leq .05$ ), data are shown in bold and italic.
